# Supplementary material for: Interleukin-32α Inhibits Endothelial Inflammation, Vascular Smooth Muscle Cell Activation, and Atherosclerosis by Upregulating Timp3 and Reck through suppressing microRNA-205 Biogenesis
Source: PubMed Central journal article supplement — Theranostics. 2017 Jun 1;7(8):2186–203. doi: 10.7150/thno.18407 (PMC5505053; doi:10.7150/thno.18407), 2017-06-01
Supplement: thnov07p2186s1.pdf [file thnov07p2186s1.pdf]

## Supplementary Material

### Methods

#### Animals and ethics statement

Human IL-32 $\alpha$ -expressing transgenic (hIL-32 $\alpha$ -Tg) mice on a C57BL/6 background[1] (Disease Animal Model Research Center, Korea Research Institute of Bioscience and Biotechnology, Daejeon, Korea) were crossed with ApoE<sup>-/-</sup> mice (B6.129P2-Apoe<sup>tm1Unc</sup>/J, Jackson Laboratory, Bar Harbor, ME, USA) to generate ApoE<sup>-/-</sup>/hIL-32 $\alpha$ -Tg mice. All genotyping was performed by polymerase chain reaction (PCR) amplification of tail-tip DNA to identify hIL-32 $\alpha$ -Tg and ApoE<sup>-/-</sup>/hIL-32 $\alpha$ -Tg mice with primers generating a 450-bp amplicon in Tg mice (primer 1: 5'-GAAGGT CCTCTCTGATGACA-3', primer 2: 5'-GGGGTTCAGAGCACTTCT-3'). The ApoE null and wild-type alleles were detected by PCR amplification using a set of 3 primers (primer 1: 5'-GCCTAGCCGAGGGAGAGCCG-3', primer 2: 5'-TGTGACTTGGGAGCTCTGCAGC-3', primer 3: 5'-GCCGCCCGACTGCATCT-3') that amplify a 155 bp wild-type band and a 245 bp targeted (null) band. All experiments were performed with littermate controls. This study was carried out in strict accordance with the Guide for the Care and Use of Laboratory Animals of Chungbuk National University (Cheongju, Chungbuk, Korea). All animal protocols were reviewed and approved by the Chungbuk National University Institutional Animal Care and Use Committee and compiled with the Korean National Institute of Health Guide for the Care and Use of Laboratory Animals (CBNUA-792-15-01).

#### Mouse partial carotid ligation surgery

Male mice were fed *ad libitum* with standard chow diet until surgery at 8–9 weeks of age. Animals were anaesthetized with 3.5% isoflurane initially; this dose was then reduced to 1.5–2% during the entire procedure while the mice were subjected to partial ligation of the left carotid artery (LCA). The LCA bifurcation was exposed by blunt dissection and 3 of 4 caudal LCA branches (the left external carotid, internal carotid, and occipital arteries) were ligated with 6-0 silk sutures, leaving the superior thyroid artery intact. The contralateral right carotid artery (RCA) was left intact as an internal control. Following surgery, analgesic buprenorphine (0.1 mg kg<sup>-1</sup>) was administered. The RCA and LCA were isolated at the indicated experimental end-points.

#### Microarray procedures

Endothelial-enriched total carotid intimal RNAs were separately obtained from the LCA and RCA of hIL-32 $\alpha$ -Tg and non-Tg mice after partial ligation as described previously[2]. At 48 h after partial ligation, intimal RNA samples from the carotid arteries of 4 mice were pooled to obtain ~50 ng of total RNA as 1 array sample, yielding 3 array samples from 12 mice per group. All RNA samples used for the DNA microarray study passed an initial quality control test by a BioAnalyzer 2100 instrument (Agilent Technologies, Santa Clara, CA, USA) and each sample was linearly amplified, as we described previously[3]. Each sample was then used for microarray studies using GeneChip<sup>®</sup> Mouse Gene 2.0 ST arrays (Affymetrix, Santa Clara, CA, USA) at BioCore Co. (Seoul, Korea). After hybridization in a GeneChip<sup>®</sup> Hybridization Oven 645 (Affymetrix), washing and staining steps proceeded in a GeneChip<sup>®</sup> Fluidics Station 450 (Affymetrix), and then the GeneChip<sup>®</sup> arrays were scanned on a GeneChip<sup>®</sup> 3000 7G

scanner (Affymetrix) to determine the probe fluorescence intensity. The raw probe intensities were then normalized by the quantile normalization algorithm[4].

### **Microarray data analysis and bioinformatics**

The normalized microarray data were statistically analyzed by GeneSpring GX 13.0 software (Agilent Technologies). The differentially expressed genes between LCA and RCA that showed more than 2.0-fold changes at *p*-values of less than 0.05 by 1-way analysis of variance were identified. The lists of differentially expressed genes were interrogated for statistically significant overrepresented cellular functions and disorders using the Cluster 3.0, TreeView, DAVID, KEGG pathway, and GeneSpring GX 13.0 software programs.

### **Comparative network analysis and functional annotation**

We constructed co-expression networks using microarray data obtained by analysis of the LCAs of hIL-32 $\alpha$ -Tg and non-Tg mice as well as publicly available microarray data from TNF- $\alpha$  treated HUVEC samples with and without exposure to apple OPC (dp3.9 apple procyanidin extract)[5]. The microarray data (GSE9647) from this study were downloaded from the GEO database (<http://www.ncbi.nlm.nih.gov/geo/>). The normalized microarray data were used to generate gene co-expression networks using WGCNA[6]. DAVID (<http://david.abcc.ncifcrf.gov/home.jsp>) was used to identify the biological processes that were significantly enriched in the genes included in the co-expression modules[7]. *p*-values < 0.05 were considered significant.

### **Quantitative real-time PCR**

Total RNA was collected from mouse carotid endothelium or EC cultures in 700  $\mu$ L of QIAzol<sup>®</sup> and purified using the miRNeasy Mini Kit (Qiagen GmbH, Hilden, Germany) according to the manufacturer's protocol. Total RNA was reverse transcribed into complementary DNA (cDNA) using a High Capacity RNA-to-cDNA kit (Applied Biosystems, Foster City, CA), and then subjected to quantitative real-time PCR (qPCR) using QuantiFast<sup>®</sup> SYBR<sup>®</sup> Green PCR master mix (Qiagen) with custom-designed specific primers using 18S as house-keeping control on a StepOnePlus<sup>™</sup> Real-Time PCR System (Applied Biosystems). Primer sequences can be found in Supplementary Table 9. For the detection of miRNA, cDNA was prepared in a reverse transcription reaction using a miScript II RT Kit (Qiagen). Mature miRNA expression was determined using a miRNA-specific miScript Primer Assay and a miScript SYBR<sup>®</sup> Green PCR Kit (Qiagen) on a StepOnePlus<sup>™</sup> Real-Time PCR System (Applied Biosystems). Specific mature and pre-mature-miRNA primers were purchased from Qiagen. Relative fold-changes in target gene expression were calculated using *Rnu6B* as an internal control. The qPCR experiments were performed as described previously[8, 9]. The fold change between groups was determined for all targets using the  $2^{\Delta\Delta Ct}$  method.

### **Dual-luciferase activity assay**

Measurement of firefly luciferase activity was obtained at RT using the Luc-Pair miR Luciferase Assay Kit (GeneCopoeia, Rockville, MD, USA) and a luminometer (1420 Luminescence Counter, PerkinElmer, Waltham, MA, USA) as recently described[8]. Standard 3'-untranslated region (UTR) luciferase assays were performed to validate *in silico* target predictions. Dual-luciferase reporter constructs containing the Timp3 3'UTR containing a miR-205-binding site (5'- UGG AAG G-3') and Reck 3'UTR with miR-205 binding site (5'- AUG AAG G-3') (kindly provided by Dr. Hanjoong Jo of Georgia Institute of Technology and Emory University, Atlanta, GA, USA) or Timp3 3'UTR with mutated miR-205-binding site (5'- GAU

UCA AGG AAA GUC GGU U-3') and Reck 3'UTR with mutated miR-205-binding site (5'- GUC GGU U-3') (custom cloned at Cosmogenetech Co., Seoul, Korea) were transfected into iMAECs using a Nucleofection Kit (Lonza, Walkersville, MD, USA) and were allowed to recover for 24 h. The second transfection was performed using increasing concentrations of miR-205 mimic (*mirVana*<sup>TM</sup>, Ambion, Foster City, CA, USA) and control-miR (Ambion) with the Lipofectamine<sup>®</sup> RNAiMAX transfection reagent (ThermoFisher Scientific, Waltham, MA, USA). Firefly and *Renilla* luciferase activities were measured using a Luciferase assay system (Promega, Madison, WI, USA) as per manufacturer recommendation.

### **Arterial wall thickening and atherosclerotic plaque formation assessment**

For studies on arterial wall thickening, animals were sacrificed by CO<sub>2</sub> gas inhalation, then aorta and carotid arteries from partial carotid-ligated hIL-32 $\alpha$ -Tg and littermate non-Tg mice fed a high-fat diet for 4 weeks were carefully excised and the surrounding fat tissue was removed by dissection. Aortas and carotid arteries were photographed using a digital microscope device (ToupCam TPH02000A, ToupTek, Hangzhou, China) with a scale bar for reference. LCA and RCA tissues were embedded in Tissue-Tek<sup>®</sup> optimal cutting temperature compound (Sakura Finetek, Torrance, CA, USA), and cryosections (7- $\mu$ m) were prepared as previously described[8]. Sections were stained with hematoxylin and eosin, then micrographs were taken using a light microscope (Axio Imager A2, Carl Zeiss, Oberkochen, Germany) at 10 $\times$  magnification and images were analyzed using NIH ImageJ software. Lesion size (cross-sectional areas; intima-media area) and wall thickness (intima media thickness) were calculated using three sections from each LCA segment as described previously[10].

For studies of atherosclerotic plaque formation, aorta and carotid arteries from partial carotid-ligated ApoE<sup>-/-</sup>/hIL-32 $\alpha$ -Tg, littermate ApoE<sup>-/-</sup>, and recombinant human IL-32 $\alpha$  protein (rhIL-32 $\alpha$ ; R&D systems, 1  $\mu$ g/mouse, administered intraperitoneally every 2 days)-injected ApoE<sup>-/-</sup> mice fed a high-fat diet [11] for 2 weeks were carefully excised, and the surrounding fat tissue was removed by dissection. The RCA and LCA were photographed using a digital microscope device (ToupCam TPH02000A) as described above, and the opaque area covered by plaque and total artery area of LCA were quantified using NIH ImageJ software as described previously[8]. To visualize atherosclerotic plaques, oil red O staining of tissue sections (7- $\mu$ m thick) was carried out, then micrographs were taken with a light microscope at 10 $\times$  magnification and images were analyzed using NIH ImageJ software. The atherosclerotic lesion area and plaque size were calculated as described previously[8].

### **Immunohistochemical and Immunofluorescence staining**

Cryosections were fixed in a 1:1 mixture of methanol/acetone for 5 min at -20 °C and then blocked (1 h, at room temperature) using 10% (v/v) donkey serum in phosphate-buffered saline (PBS). Immunohistochemical staining was carried out using the following antibodies: IL-32 (KU-32-52, 1:100),  $\alpha$ -SMA (Abcam, Cambridge, UK, 1:200), CD31 (Abcam, 1:100), VCAM-1 (BD Biosciences, Franklin Lakes, NJ, USA, 1:50), ICAM-1 (Santa Cruz Biotechnology, Dallas, TX, USA, 1:100), MOMA2 (Abcam, 1: 100), TIMP3 (Abcam, 1:50), and (Cell Signaling Technology, Danvers, MA, USA, 1:100) overnight at 4 °C. The sections were incubated with biotinylated secondary antibodies for 2 h at room temperature. After washing in PBS, the immunocomplex was visualized using 3,3'-diaminobenzidine solution (2 mg/10 mL) containing 0.08% (v/v) hydrogen peroxide in PBS. Sections were dehydrated in a series of graded alcohols, cleared in xylene, and mounted with coverslips using Permount<sup>TM</sup> (Fisher Scientific, Suwanee, GA, USA).

Immunohistological images were acquired using a light microscope (Axio Imager A2, Carl Zeiss).

For immunofluorescence analysis, all sections were incubated with primary antibodies (VCAM-1 and ICAM-1 from Santa Cruz Biotechnology used at 1:200 dilution; CD31 from Abcam at 1:500) overnight at 4 °C, followed by staining with Alexa Flour 568-conjugated donkey anti-goat secondary antibody (Invitrogen, Carlsbad, CA, USA, 1:300) for VCAM-1 and ICAM-1. Alexa Flour 680-conjugated donkey anti-rat secondary antibody (Invitrogen, 1:300) was used for CD31. Nuclei were counterstained with DAPI and mounted with coverslips using an anti-fade fluorescent mounting media (DAKO, Santa Clara, CA, USA). Samples were imaged using Zeiss LSM 710 confocal microscope (Carl Zeiss).

### **ECs and VSMCs culture and treatment with siRNAs and miRNA mimic**

Human umbilical vein endothelial cells (HUVECs; Lonza) were cultured and maintained as described previously[12]. Immortalized mouse aortic ECs (iMAECs) were generated from C57BL/6 mice as previously described[13]. Primary mouse arterial VSMCs were isolated from the thoracic aorta of hIL-32 $\alpha$ -Tg mice and their littermate control (non-Tg) mice, and maintained as described previously[14]. Timp3, Reck, Dgcr8, Drosha, Dicer1, and Rprd2 siRNAs (Stealth RNAi™, ThermoFisher Scientific) or miR-205 mimic (Ambion) were transfected into cells using Lipofectamine® RNAiMAX transfection reagent (ThermoFisher Scientific) in normal culture medium, following the manufacturer's protocol.

### **Transient expression of hIL-32 $\alpha$ in ECs**

For the examination of gene expression and tests of cell functions *in vitro*, iMAECs or HUVECs were transiently transfected with the pcDNA3.1<sup>+</sup>-6 $\times$ Myc-hIL-32 $\alpha$  vector or a control vector using Lipofectamine® 3000 (Life Technologies, Carlsbad, CA, USA), following the manufacturer's protocol as described previously[15].

### **Smooth muscle cell proliferation and migration assay**

VSMCs isolated from hIL-32 $\alpha$ -Tg or non-Tg mice were used. Cells were seeded in a 96-well plate at a density of  $5 \times 10^3$  cells/mL in Dulbecco's modified Eagle's medium for 24 h, and then transfected with siRNAs, miR-205 mimic, or rhIL-32 $\alpha$  for 24 h before starving in serum-free medium for 24 h. The transfected cells were stimulated with 25 ng/mL of platelet-derived growth factor (PDGF)-BB (PeproTech, Rocky Hill, NJ, USA) for 24 h, and cell proliferation was determined using a BrdU cell proliferation assay kit (BioVision, Milpitas, CA, USA) according to the manufacturer's instructions. Briefly, cells were pulsed with BrdU for 2 h after 20 h PDGF-BB stimulation. ELISAs were performed using antibody for BrdU and the absorbance was measured by a plate reader at 450 nm. BrdU incorporation was calculated as the percentage of BrdU incorporated with respect to the untreated serum-free control. To determine migration, VSMCs were seeded in a  $\mu$ -Dish with culture inserts (ibidi, Martinsried, Germany) and then maintained in serum-free media for 24 h before performing the migration assays. VSMCs were stimulated with PDGF-BB (25 ng/mL), and then cell migration was monitored for 24 h by taking a picture every 3 h. The area of the migrated cells was quantified using NIH ImageJ software.

### **Preparation of whole-cell lysates and immunoblotting**

Following treatment, cells were washed 3 times with ice-cold PBS and lysed with radioimmunoprecipitation (RIPA) assay buffer. The protein content of each sample was determined using a DC assay kit (Bio-Rad, Hercules, CA, USA). Aliquots of cell lysates were resolved by 10% SDS-PAGE

and subsequently transferred to a polyvinylidene difluoride membrane (EMD Millipore, Billerica, MA, USA). The membrane was incubated with the following antibodies: Myc (Abcam; 1:1,000), IL-32 (KU-32-52; BioLegend, San Diego, CA, USA, 1:1,000), VCAM-1 (Santa Cruz Biotechnology; 1:500), ICAM-1 (Santa Cruz Biotechnology, 1:500), PCNA (Cell Signaling Technology; 1:500), p21 (Santa Cruz Biotechnology; 1:500), phospho-ERK1/2 (Cell Signaling Technology; 1:500), total-ERK1/2 (Cell Signaling Technology; 1:500), Timp3 (Abcam; 1:1,000), and Reck (Cell Signaling Technology; 1:1,000) overnight at 4 °C, followed by secondary antibody (1:2,000) for 1 h at room temperature. Immunoreactive bands were then detected by chemiluminescence. Full-sized scans of all western blots are provided in Supplementary Figs. 14–16.

### **Monocyte-EC adhesion assay**

Following the transfection of iMAECs or HUVECs with hIL-32 $\alpha$ -expressing vector, siRNAs, or miR-205 mimic, or treatment with rhIL-32 $\alpha$  for 24 h, the cells were treated with TNF $\alpha$  (10 ng/mL) for 24 h, and a monocyte-EC binding assay was performed using fluorescently labeled THP-1 cells as described previously[16]. Adherent cells were quantified by fluorescence microscopy[12].

### **Enzyme-linked immunosorbent assay (ELISA)**

Human IL-32 $\alpha$  (hIL-32 $\alpha$ ) was transiently expressed in iMAECs as described above. Cells were then transfected with siRNAs for Timp3 or Reck or combination (final concentration, 100 nM) for 24 h, then starved in serum-free medium for 24 h and stimulated with 25 ng/mL of platelet-derived growth factor (PDGF)-BB for 24 h, the stimulated with IL-1 $\beta$  (10 ng/mL) for 24 h. Soluble-TNF $\alpha$  or IL-10 in conditioned culture medium was measured using mouse soluble-TNF $\alpha$  or IL-10 ELISA kits (R&D Systems, Minneapolis, MN, USA) following the manufacturer's protocol.

### ***In situ* zymography**

To measure the activity of MMPs in mouse carotid frozen sections, *in situ* zymography was performed in unfixed sections (30- $\mu$ m thick) using DQ<sup>TM</sup>-gelatin substrate (Molecular Probes, Eugene, OR, USA) as described previously[8, 9]. DQ<sup>TM</sup>-gelatin was dissolved in a concentration of 1 mg/mL in water and then diluted 1:10 in reaction buffer according to the manufacturer's protocol. The mixture (50  $\mu$ L) was put on top of the sections and incubated for 6 h at room temperature. Proteolytic activity was detected as green fluorescence (530 nm) by fluorescence microscopy.

### **MMP activity analysis**

A cell-based ELISA using the DQ<sup>TM</sup>-gelatin assay was employed to assess MMP activity as described previously[9]. VSMCs from non-Tg and hIL-32 $\alpha$ -Tg mice aorta were seeded in a 96-well plate and treated with PDGF-BB (25 ng/mL) in serum-free medium for 24 h, then DQ<sup>TM</sup>-gelatin (100  $\mu$ g/mL) was added and incubated for 12 h. Product formation was determined by excitation 495 nm and emission at 515 nm (SpectraMax<sup>®</sup> Gemini EM Fluorescence Microplate Reader; Molecular Devices, Sunnyvale, CA, USA).

### **Gelatin zymography**

For *in vitro* gelatinolytic activity of MMP-2 or MMP-9 assay, a gelatin zymography assay using the SDS-acrylamide gels containing 0.1% gelatin was employed. VSMCs from non-Tg and hIL-32 $\alpha$ -Tg mice aorta were cultured in 6-well plate to 90% confluence. Cells were then washed with phosphate-buffered saline

(PBS), and incubated with serum-free culture medium with or without PDGF-BB (25 ng/mL) for 24 h. Conditioned culture medium was then collected and their gelatinolytic activity was measured by gelatin zymography as described previously[17]. Gels were washed in renaturing buffer for 30 min, and at least 24 h in developing buffer at 37°C. Gels were staining with 0.5% (w/v) Coomassie brilliant blue R-250 solution for 30 min at room temperature, and destained with a destaining solution (methanol/acetic acid/water, 50/10/40, v/v) MMP activity in the gel was detected as white bands against a dark blue background. Band intensity was quantified using NIH ImageJ software. A full-sized scan of the gel is provided in Supplementary Fig. 17.

### ***In situ ADAMs activity assay***

ADAM activity was assessed by detection of a fragment peptide (DPEAAE) produced from the digestion of versican s by immunofluorescence staining. Sections were fixed in cold acetone for 5 min at -20 °C, and incubated with a primary antibody against the versican fragment (Abcam, 1:300) overnight at 4 °C, followed by DyLight® 549-conjugated donkey anti-rabbit secondary antibody (Jackson ImmunoResearch, West Grove, PA, USA, 1:250). Nuclei were counterstained with DAPI. Samples were imaged using fluorescence microscopy

### **Statistical analysis**

Statistical analysis was carried out using GraphPad Prism 5.0 (GraphPad Software Inc., La Jolla CA, USA). Pairwise comparisons were performed using 1-way Student's *t*-tests. Data are presented as means ± standard error of the mean (SEM) of the indicated number of experiments. Differences between groups were considered significant at  $p < 0.05$ .

### **References:**

1. Hwang CJ, Yun HM, Jung YY, Lee DH, Yoon NY, Seo HO, et al. Reducing effect of IL-32alpha in the development of stroke through blocking of NF-kappaB, but enhancement of STAT3 pathways. *Mol Neurobiol.* 2015; 51: 648-60.
2. Nam D, Ni CW, Rezvan A, Suo J, Budzyn K, Llanos A, et al. Partial carotid ligation is a model of acutely induced disturbed flow, leading to rapid endothelial dysfunction and atherosclerosis. *American journal of physiology Heart and circulatory physiology.* 2009; 297: H1535-43.
3. Ni CW, Qiu H, Rezvan A, Kwon K, Nam D, Son DJ, et al. Discovery of novel mechanosensitive genes in vivo using mouse carotid artery endothelium exposed to disturbed flow. *Blood.* 2010; 116: e66-73.
4. Bolstad BM, Irizarry RA, Astrand M, Speed TP. A comparison of normalization methods for high density oligonucleotide array data based on variance and bias. *Bioinformatics.* 2003; 19: 185-93.
5. Garcia-Conesa MT, Tribolo S, Guyot S, Tomas-Barberan FA, Kroon PA. Oligomeric procyanidins inhibit cell migration and modulate the expression of migration and proliferation associated genes in human umbilical vascular endothelial cells. *Molecular nutrition & food research.* 2009; 53: 266-76.
6. Langfelder P, Horvath S. WGCNA: an R package for weighted correlation network analysis. *BMC Bioinformatics.* 2008; 9: 559.
7. Dennis G, Jr., Sherman BT, Hosack DA, Yang J, Gao W, Lane HC, et al. DAVID: Database for Annotation, Visualization, and Integrated Discovery. *Genome Biol.* 2003; 4: P3.

8. Son DJ, Kumar S, Takabe W, Kim CW, Ni CW, Alberts-Grill N, et al. The atypical mechanosensitive microRNA-712 derived from pre-ribosomal RNA induces endothelial inflammation and atherosclerosis. *Nature communications*. 2013; 4: 3000.
9. Kim CW, Kumar S, Son DJ, Jang IH, Griendling KK, Jo H. Prevention of abdominal aortic aneurysm by anti-microRNA-712 or anti-microRNA-205 in angiotensin II-infused mice. *Arteriosclerosis, thrombosis, and vascular biology*. 2014; 34: 1412-21.
10. Son DJ, Kim SY, Han SS, Kim CW, Kumar S, Park BS, et al. Piperlongumine inhibits atherosclerotic plaque formation and vascular smooth muscle cell proliferation by suppressing PDGF receptor signaling. *Biochemical and biophysical research communications*. 2012; 427: 349-54.
11. Nishina PM, Verstuyft J, Paigen B. Synthetic low and high fat diets for the study of atherosclerosis in the mouse. *Journal of lipid research*. 1990; 31: 859-69.
12. Ni CW, Qiu H, Jo H. MicroRNA-663 upregulated by oscillatory shear stress plays a role in inflammatory response of endothelial cells. *American journal of physiology Heart and circulatory physiology*. 2011; 300: H1762-9.
13. Ni CW, Kumar S, Ankeny CJ, Jo H. Development of immortalized mouse aortic endothelial cell lines. *Vasc Cell*. 2014; 6: 7.
14. Kobayashi M, Inoue K, Warabi E, Minami T, Kodama T. A simple method of isolating mouse aortic endothelial cells. *Journal of atherosclerosis and thrombosis*. 2005; 12: 138-42.
15. Yun HM, Oh JH, Shim JH, Ban JO, Park KR, Kim JH, et al. Antitumor activity of IL-32[beta] through the activation of lymphocytes, and the inactivation of NF-[kappa]B and STAT3 signals. *Cell death & disease*. 2013; 4: e640.
16. Sorescu GP, Sykes M, Weiss D, Platt MO, Saha A, Hwang J, et al. Bone morphogenic protein 4 produced in endothelial cells by oscillatory shear stress stimulates an inflammatory response. *The Journal of biological chemistry*. 2003; 278: 31128-35.
17. Troeberg L, Nagase H. Zymography of metalloproteinases. *Curr Protoc Protein Sci*. 2004; Chapter 21: Unit 21 15.

## Supplementary Figures and Legends

Supplementary Figure 1.

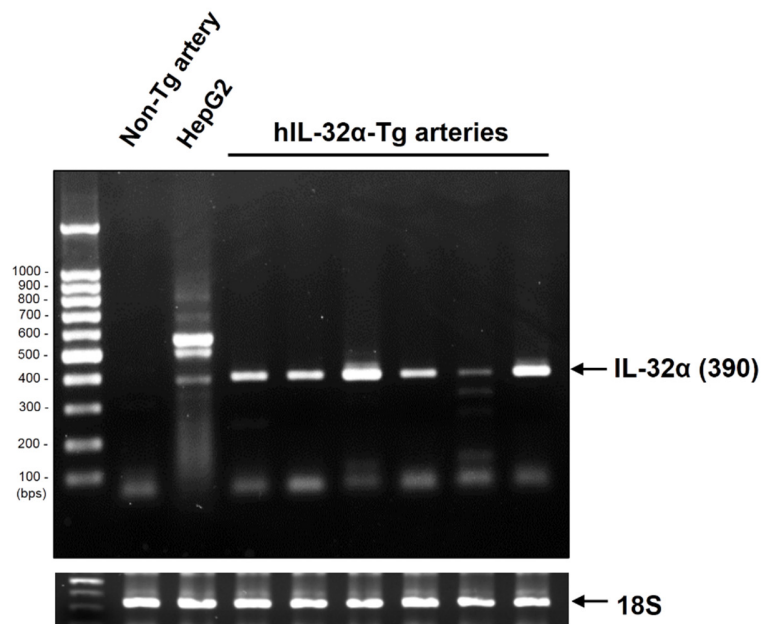

**Supplementary Figure 1. Confirmation of hIL-32 $\alpha$  mRNA expression in aorta tissue from hIL-32 $\alpha$ -Tg mice.** Total RNA samples were extracted from thoracic and abdominal aorta of hIL-32 $\alpha$ -Tg and non-Tg littermate control mice and analyzed by RT-PCR. Non-Tg littermate control mice aorta tissue and HepG2 cells served as negative and positive controls, respectively.



Supplementary Figure 2.

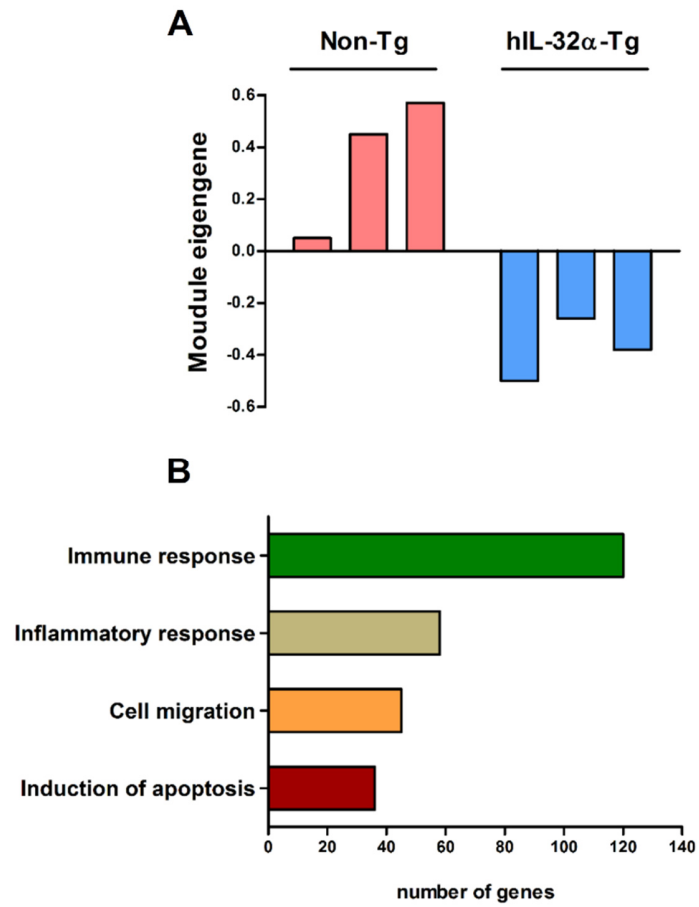

**Supplementary Figure 2. Co-expression module associated with hIL-32 $\alpha$ .** (A) The eigengene values across samples in the IL-32 $\alpha$ \_M14. (B) Major biological processes (gene ontology) significantly enriched in the genes in the co-expression module.

**Supplementary Figure 3.**

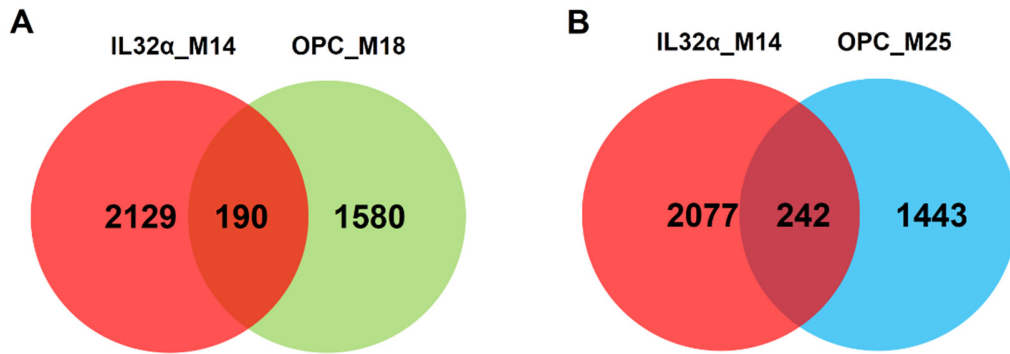

**Supplementary Figure 3. Comparative network analysis of the hIL-32 $\alpha$  associated module.** (a) Venn diagram showing the number of common and unique genes between the hIL-32 $\alpha$ -associated module IL-32 $\alpha$ \_M14 and the two modules, OPC\_M18 (**A**) and OPC\_M25 (**B**), which associated with apple oligomeric procyanidin (OPC) treatment.

Supplementary Figure 4.

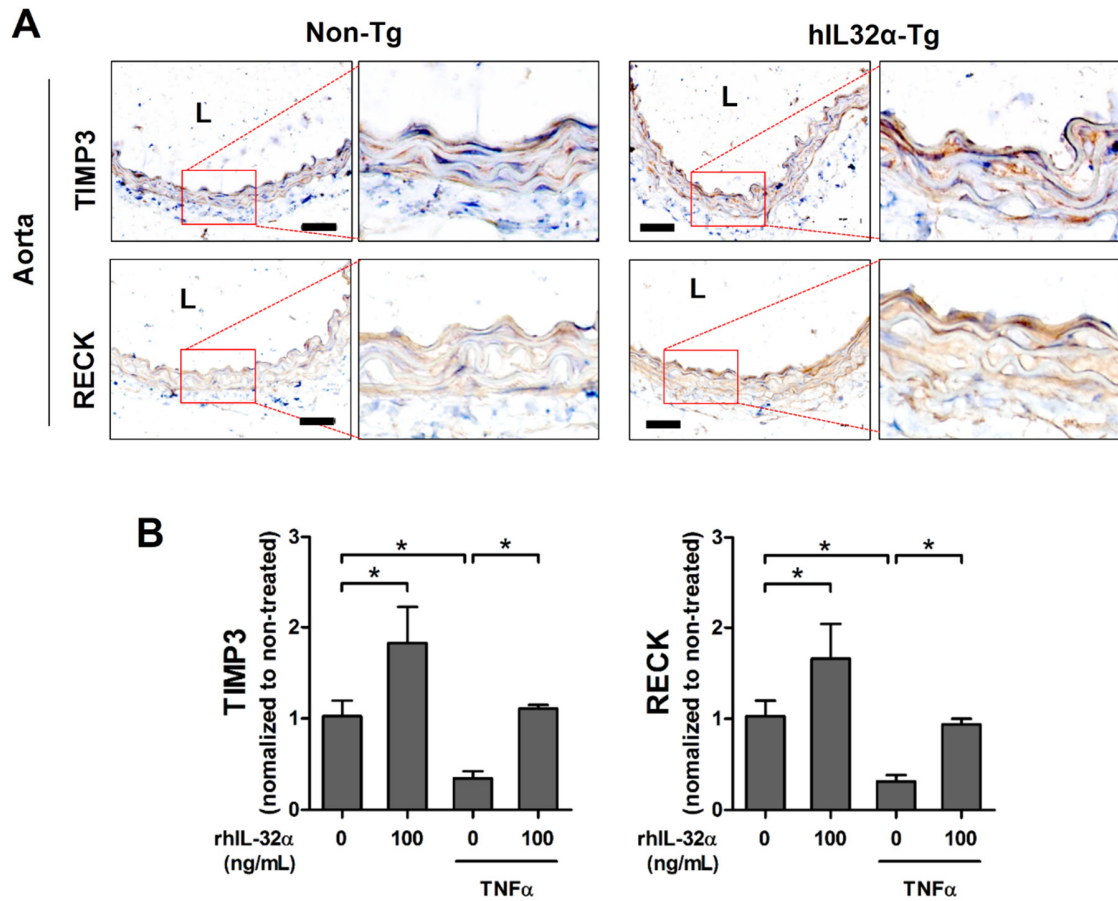

**Supplementary Figure 4. *Timp3* and *Reck* expression in the hIL-32 $\alpha$ -Tg mice aorta and hIL-32 $\alpha$ -overexpressing iMAECs.** (A) Frozen sections of thoracic aorta tissues from hIL-32 $\alpha$ -Tg and littermate non-Tg control mice were stained with *Timp3* and *Reck* antibodies. Representative microscopy images are shown. The red rectangle indicates the magnified area shown in the lower panel. Nuclei (blue); protein expression (brown). L, lumen. Scale bar, 100  $\mu$ m. (B) iMAECs were cultured in a 6-well culture plate for 24 h, then treated with recombinant human IL-32 $\alpha$  protein (rhIL-32 $\alpha$ ). After 24 h, cells were treated with tumor necrosis factor  $\alpha$  (TNF $\alpha$ ) (10 ng/mL; 24 h), and *Timp3* and *Reck* mRNA expression was determined by qPCR (data shown as mean $\pm$ SEM;  $n=3$ , \* $P<0.05$  as determined by Student's  $t$ -test).

### Supplementary Figure 5.

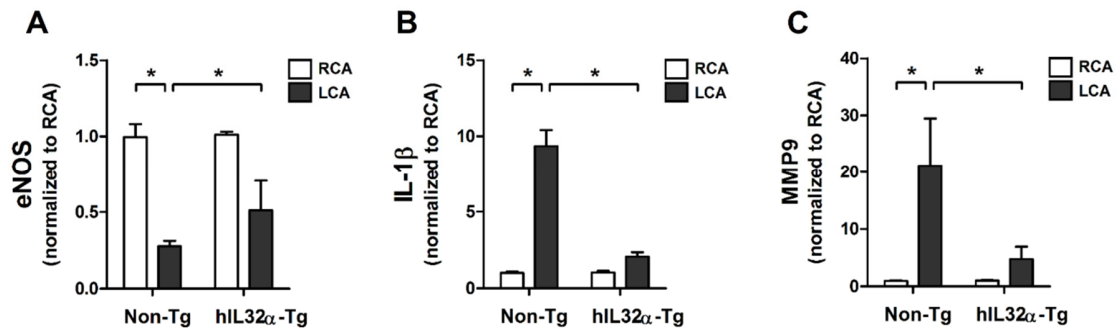

**Supplementary Figure 5. eNOS, IL-1 $\beta$ , and MMP9 expression in the hIL-32 $\alpha$ -Tg mice carotid endothelium.** eNOS (*Nos3*) (A), IL-1 $\beta$  (*Il1b*) (B), and MMP9 (*Mmp9*) (C) mRNA expression was determined by qPCR using endothelial-enriched RNA obtained from left carotid artery (LCA) and right carotid artery (RCA) following partial carotid ligation in hIL-32 $\alpha$ -Tg or non-Tg mice at 2 days post-ligation (data shown as mean  $\pm$  SEM;  $n = 5$  each,  $*P < 0.05$  as determined by Student's *t*-test).

Supplementary Figure 6.

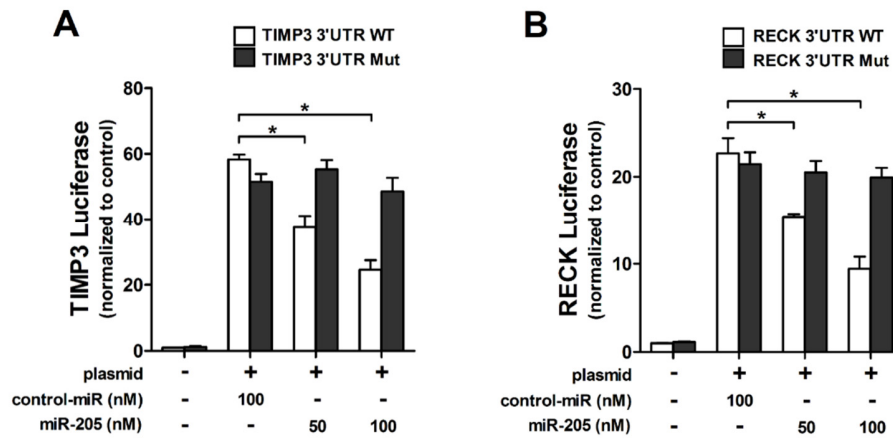

**Supplementary Figure 6. miR-205 directly targets Timp3 and Reck.** (A) iMAECs were cultured, then transfected with dual-luciferase reporter plasmids containing wild-type (WT) or mutant (Mut) of (A) Timp3-3'UTR and (B) Reck-3'UTR by electroporation. Cells were allowed to recover for 24 h, and treated with mature-miR-205 mimic or control-miR mimic. Firefly luciferase activity (normalized to control *Renilla* luciferase) indicating Timp3 and Reck expression was determined using a Luciferase assay system. ( $n = 6$ ). All data shown as mean  $\pm$  SEM,  $*P < 0.05$  as determined by Student's *t*-test.

Supplementary Figure 7.

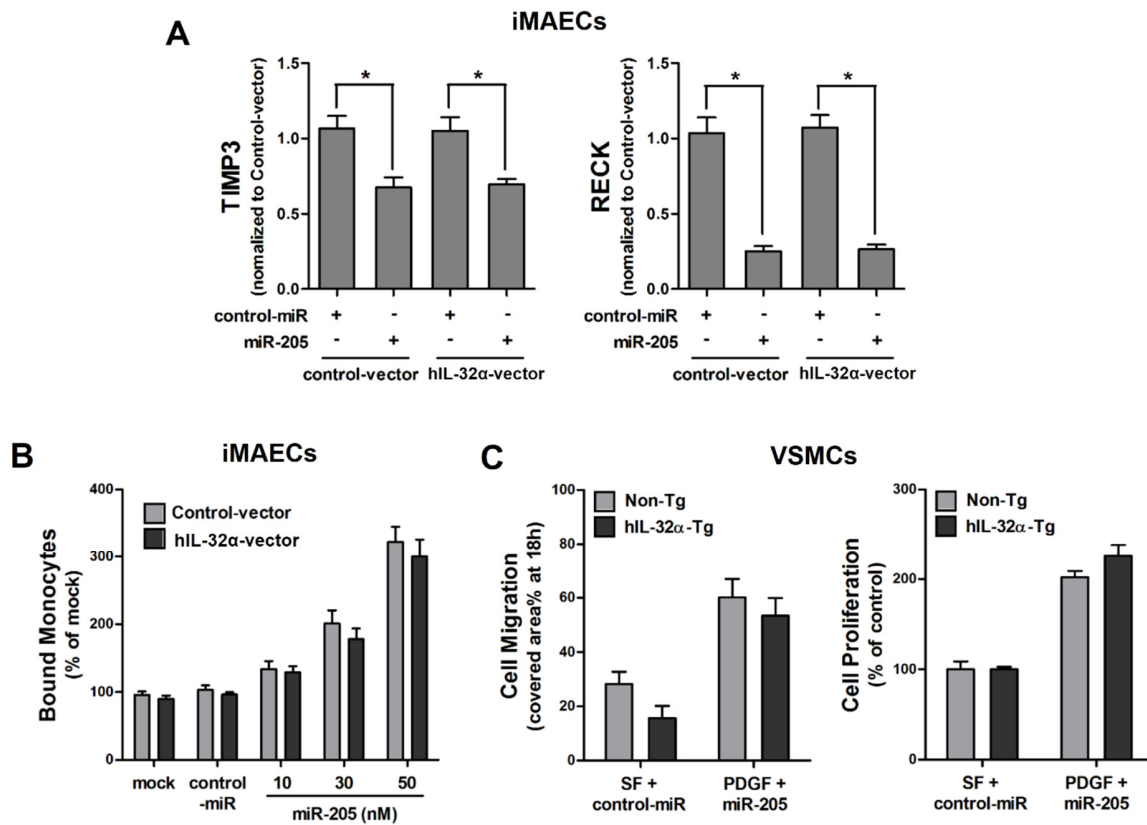

**Supplementary Figure 7. hIL-32 $\alpha$  expression does not alter miR-205 biological function.** (A) iMAECs were transfected with hIL-32 $\alpha$ -expressing pcDNA3.1<sup>+</sup>-6 $\times$ Myc or control vector. After 24 h, cells were then transfected with mature-miR-205 mimic (50 nM; 24 h) or control-miR mimic, and *Timp3* and *Reck* mRNA expression was determined by qPCR ( $n = 4$ ). (B) iMAECs were transfected with hIL-32 $\alpha$  or control vector, then treated with mature-miR-205 mimic (10–50 nM; 24 h), and THP-1 monocyte adhesion to iMAECs was determined ( $n = 3$ ). (C) Primary cultured VSMCs from hIL-32 $\alpha$ -Tg or non-Tg mice aorta were transfected with mature-miR-205 mimic (50 nM) or control-miR mimic. Cells were then treated with PDGF-BB (25 ng/mL) in serum-free media, and cell migration ( $n = 3$ ) and cell proliferation ( $n = 5$ ) were determined. All data shown as mean  $\pm$  SEM, \* $P < 0.05$  as determined by Student's *t*-test.

Supplementary Figure 8.

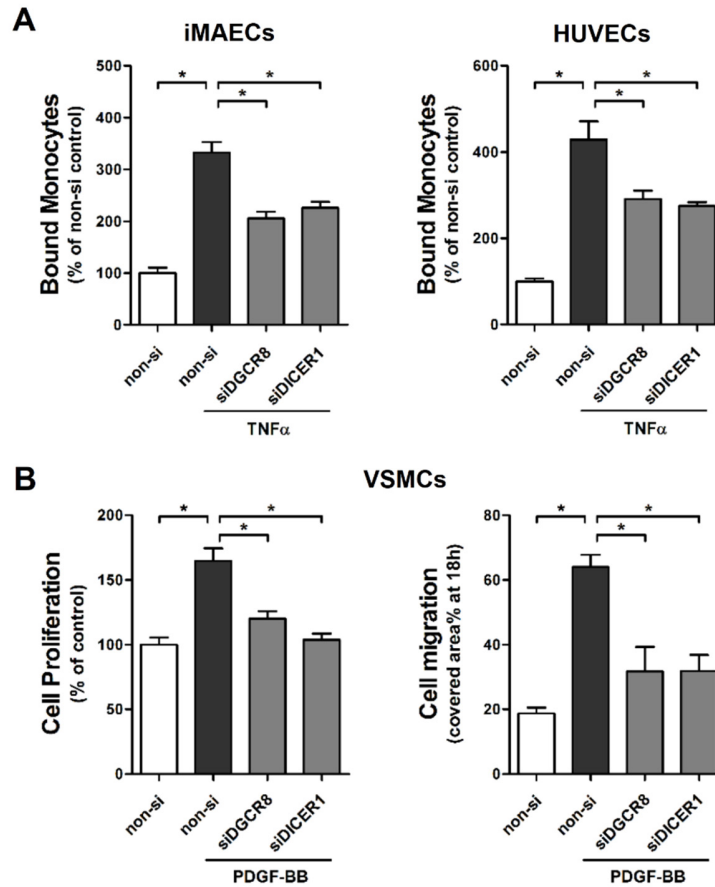

**Supplementary Figure 8. Knockdown of Dgcr8 and Dicer1 inhibits EC inflammation and VSMC proliferation and migration.** (A) iMAECs and HUVECs were transfected with Dgcr8 and Dicer1 siRNA (siDgcr8 or siDicer1, 150 nM) for 24 h. Cells were then treated with TNF $\alpha$  (10 ng/mL; 24 h), and monocyte-EC adherence was determined ( $n = 6$  each). (B) VSMCs isolated from the thoracic aortas of non-Tg mice were transfected with siDgcr8 or siDicer1 (150 nM), then VSMC proliferation and migration were determined by wound healing ( $n = 3$ ) and BrdU incorporation assays ( $n = 6$ ), respectively, as described in the Methods. All data shown as mean  $\pm$  SEM,  $*p < 0.05$  as determined by Student's  $t$ -test.

**Supplementary Figure 9.**

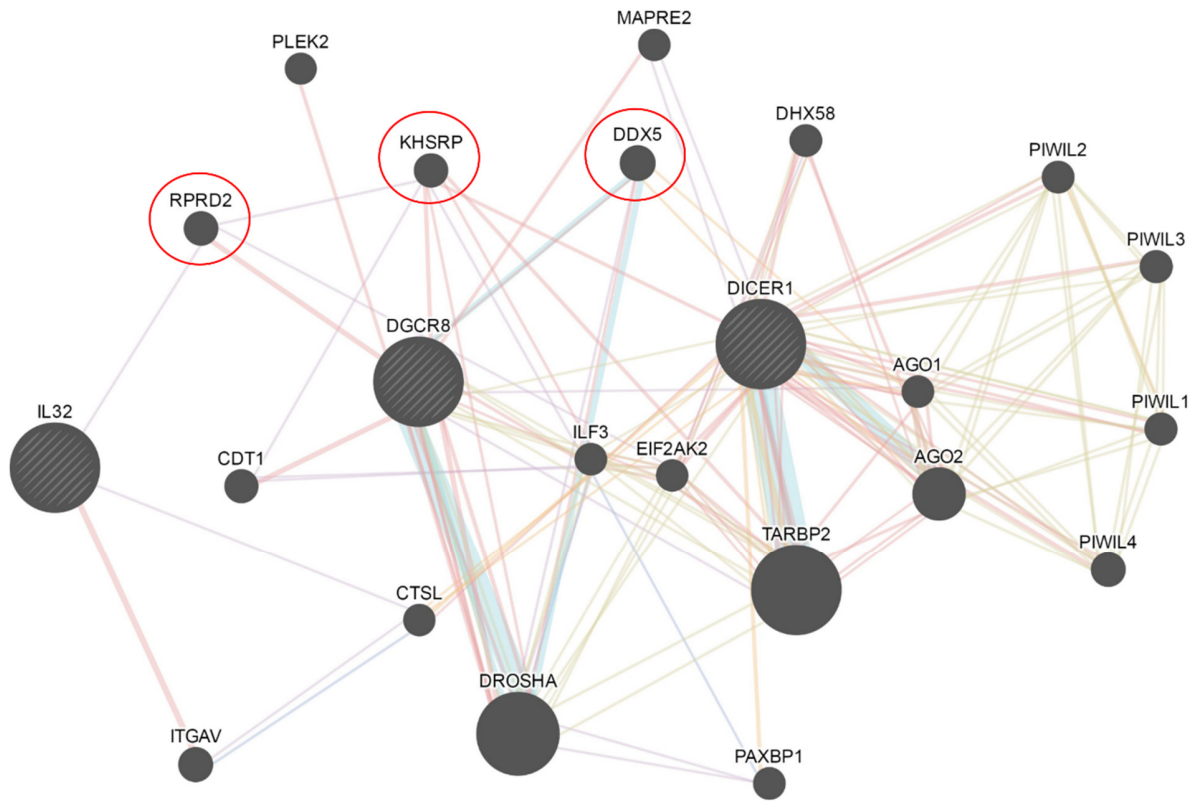

**Supplementary Figure 9. Gene network analysis using GeneMANIA.** The relationships between IL-32 and Dgcr8/Drosha/Dicer1 are shown based on known functional association networks.



Supplementary Figure 10.

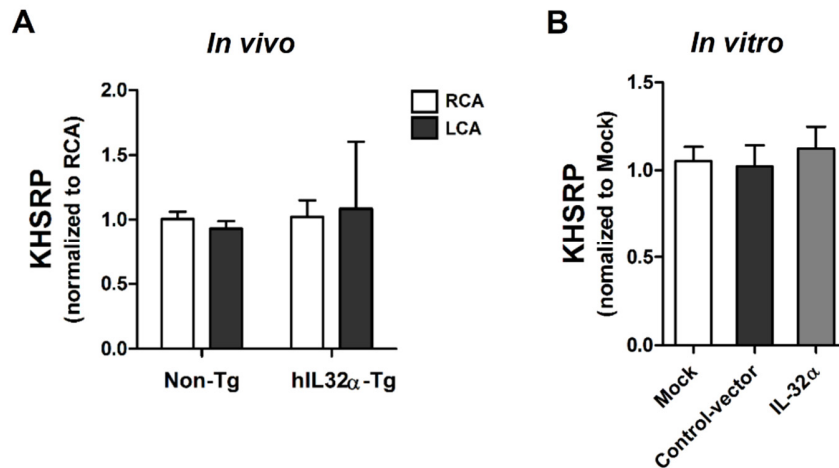

**Supplementary Figure 10. *Khsrp* expression in hIL-32 $\alpha$ -Tg mice carotid endothelium and hIL-32 $\alpha$ -expressed iMAECs.** (A) *Khsrp* mRNA expression was determined by qPCR using endothelial-enriched RNA obtained from left carotid artery (LCA) and right carotid artery (RCA) following partial carotid ligation in hIL-32 $\alpha$ -Tg or non-Tg mice at 2 days post-ligation ( $n = 5$ ). (B) iMAECs were cultured in a 12-well culture plate for 24 h, then transfected with human IL-32 $\alpha$  expressing pcDNA3.1<sup>+</sup>-6 $\times$ Myc vector (IL-32 $\alpha$ ) or control-vector. After 24 h, cells were then treated with TNF $\alpha$  (10 ng/mL; 24 h), and *Khsrp* mRNA expression was determined by qPCR. All data shown as mean  $\pm$  SEM, \* $P < 0.05$  as determined by Student's *t*-test.

Supplementary Figure 11.

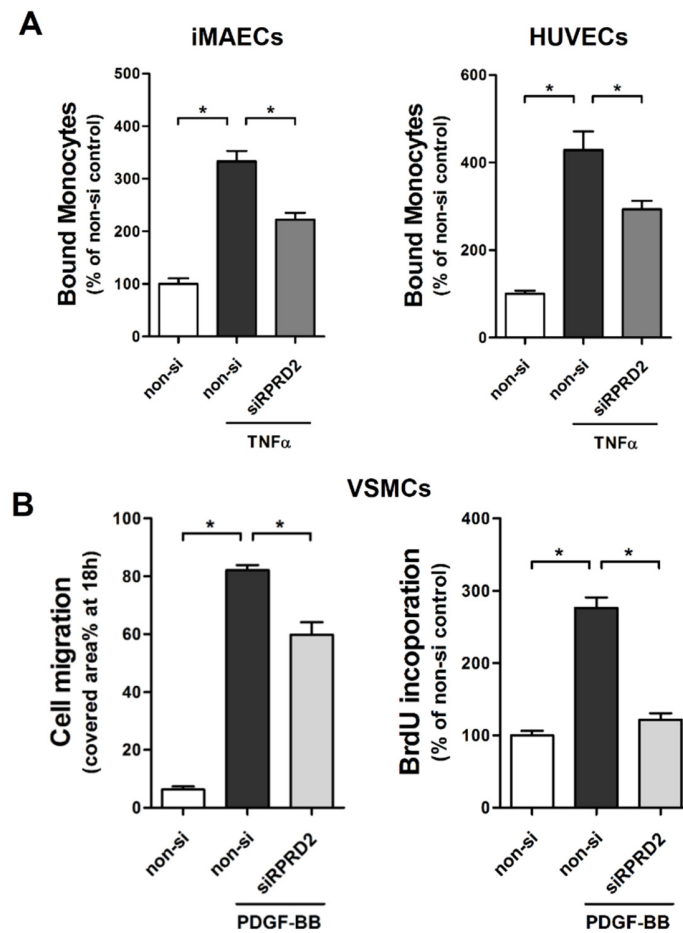

**Supplementary Figure 11. Knockdown of Rpr2 inhibits EC inflammation and VSMC proliferation and migration.** (A) iMAECs and HUVECs were transfected with Rpr2 siRNA (siRpr2, 200 nM) for 24 h. Cells were then treated with TNF $\alpha$  (10 ng/mL; 24 h), and monocyte-EC adherence was determined ( $n = 6$  each). (B) VSMCs isolated from the thoracic aortas of non-Tg mice were transfected with siRpr2 (200 nM), then VSMC proliferation and migration were determined by wound healing ( $n = 3$ ) and BrdU incorporation assays ( $n = 6$ ), respectively, as described in the Methods. All data shown as mean  $\pm$  SEM,  $*p < 0.05$  as determined by paired  $t$ -test.

Supplementary Figure 12.

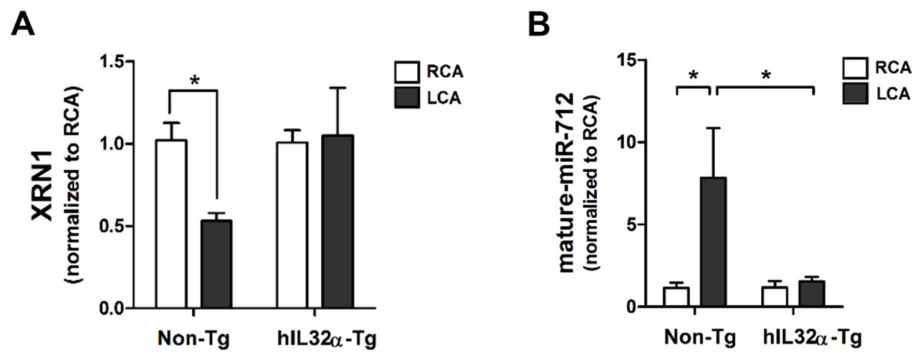

**Supplementary Figure 12. Effect of IL-32 $\alpha$  on expression of the noncanonical microRNA processor XRN1 and mature-microRNA-712 in the mouse endothelium.** Expression of (A) *Xrn1* mRNA and (B) mature-microRNA-712 (miR-712) were determined by qPCR using endothelial-enriched RNA obtained from left carotid artery (LCA) and right carotid artery (RCA) following partial carotid ligation in hIL-32 $\alpha$ -Tg or non-Tg mice at 2 days post-ligation ( $n = 5$  each, data shown as mean  $\pm$  SEM,  $*P < 0.05$  as determined by Student's *t*-test).

Supplementary Figure 13.

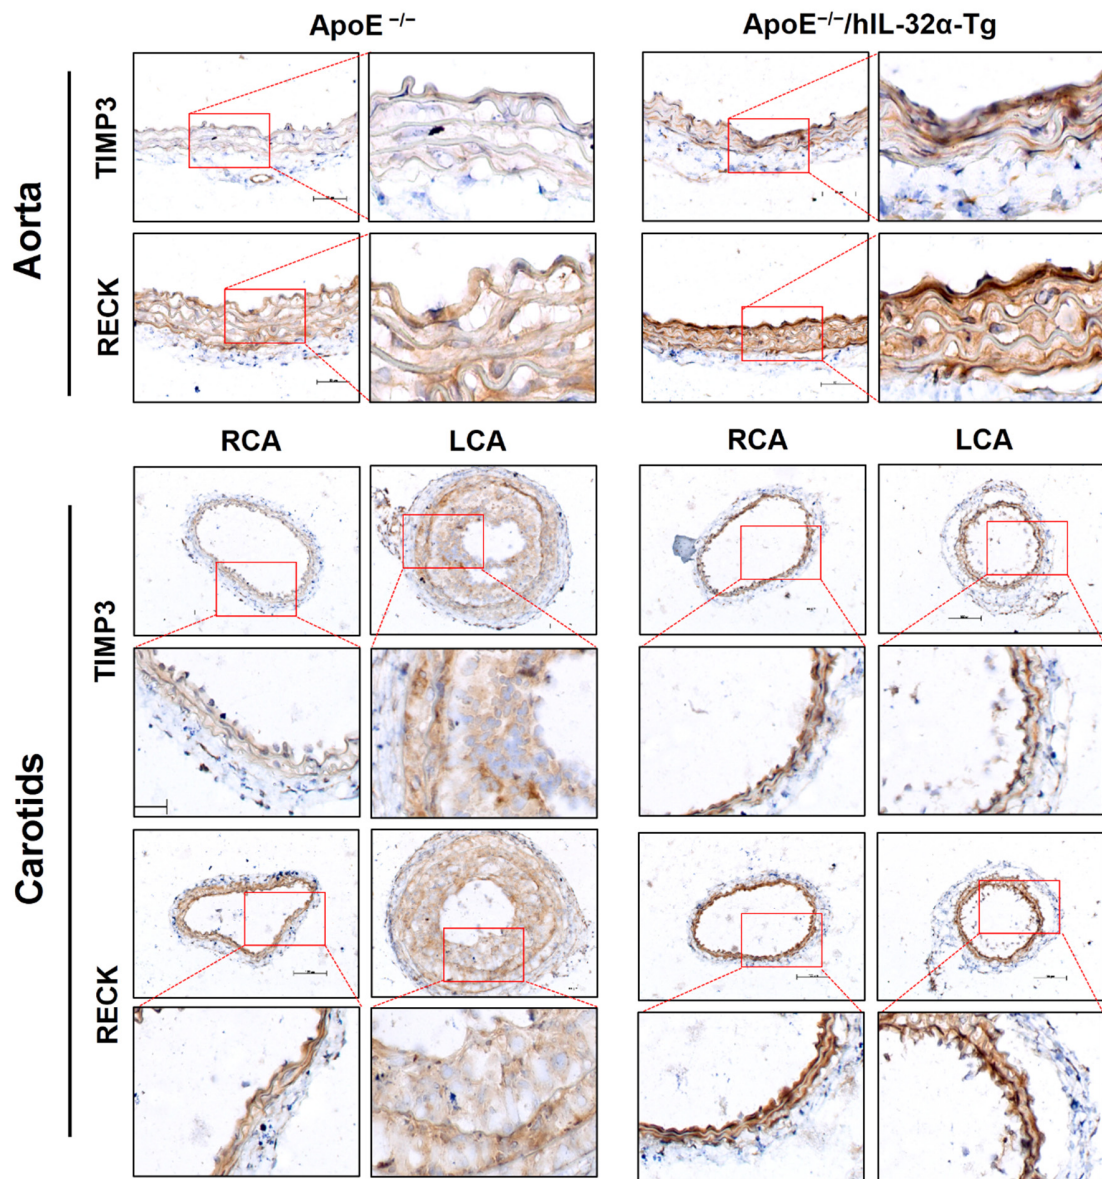

**Supplementary Figure 13. Timp3 and Reck expression in ApoE<sup>-/-</sup>/hIL-32α-Tg mice aorta and carotid arteries.** ApoE<sup>-/-</sup>/hIL-32α-Tg and littermate ApoE<sup>-/-</sup>/non-Tg control mice were partially ligated and fed a high-fat diet for 2 weeks. Frozen sections of thoracic aorta and carotid tissues from hIL-32α-Tg and littermate non-Tg control mice were stained with Timp3 and Reck antibodies. Images shown are representative microscopy images. The red rectangle indicates the magnified area shown in the lower panel. Nuclei (blue); protein expression (brown).

Supplementary Figure 14.

Fig. 1B

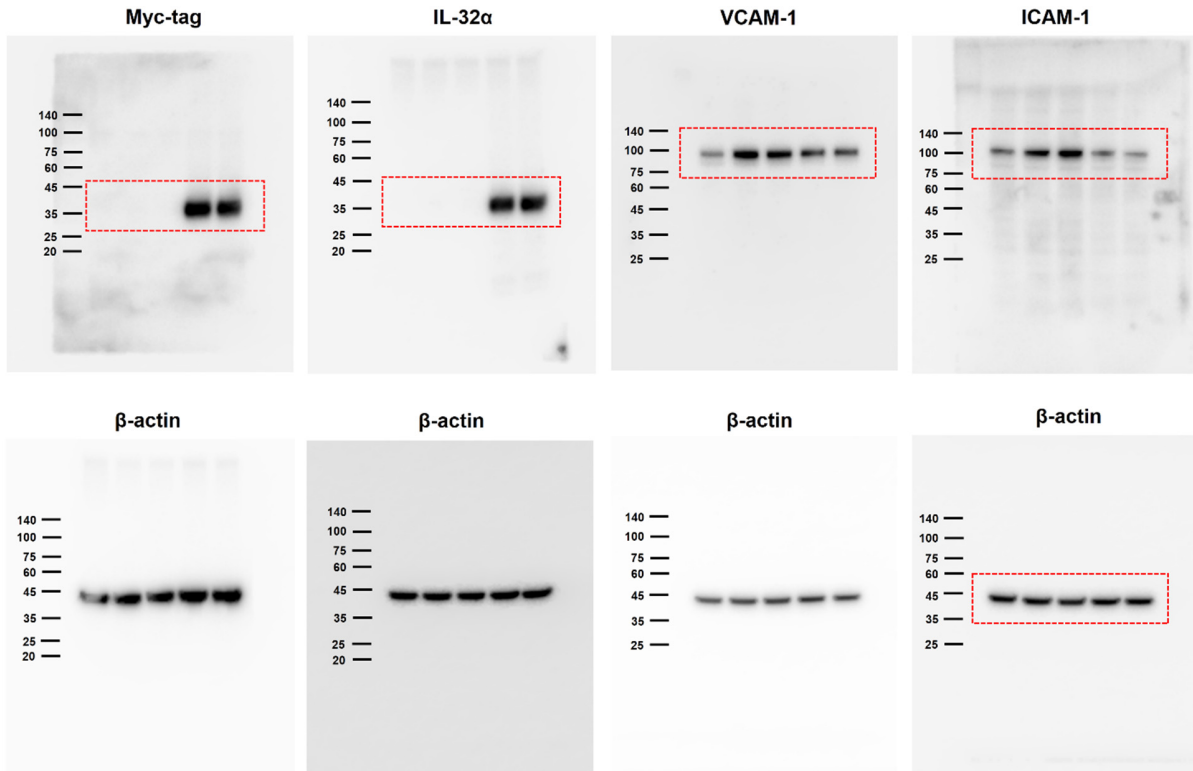

Supplementary Figure 14. Full western blot images for Myc-tag, IL-32, VCAM-1, ICAM-1, and respective  $\beta$ -actin control bands shown in Figure 1B. The red dotted rectangle indicates the area shown in Fig. 1B.

Supplementary Figure 15.

Fig. 1C

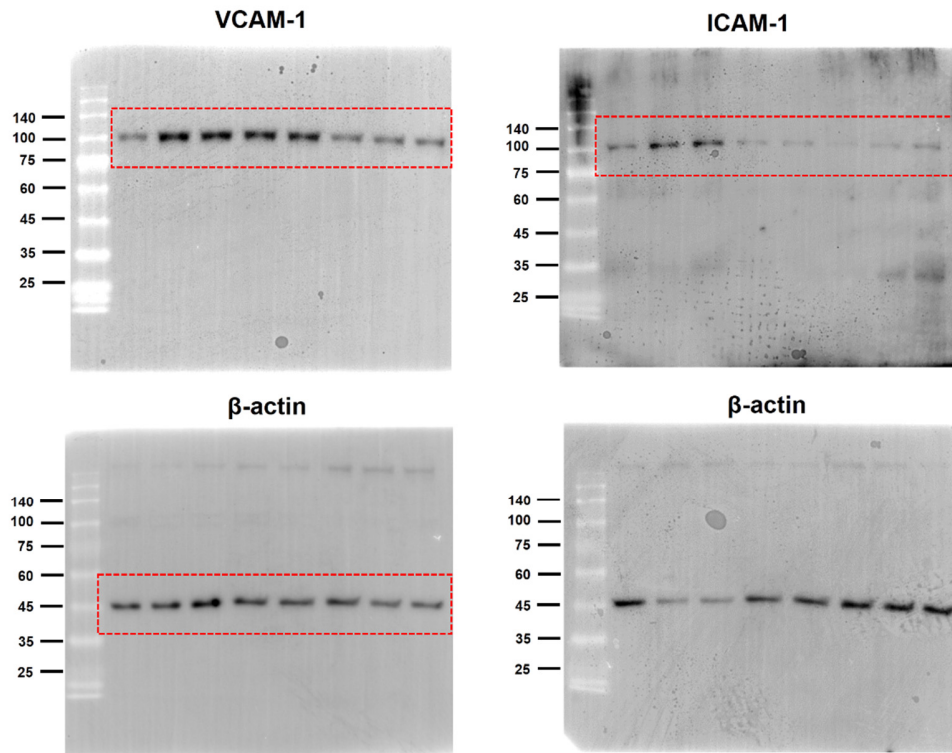

Supplementary Figure 15. Full western blot images for VCAM-1, ICAM-1, and the respective  $\beta$ -actin control bands shown in Figure 1C. The red dotted rectangle indicates the area shown in Fig. 1C.

Supplementary Figure 16.

Fig. 2E

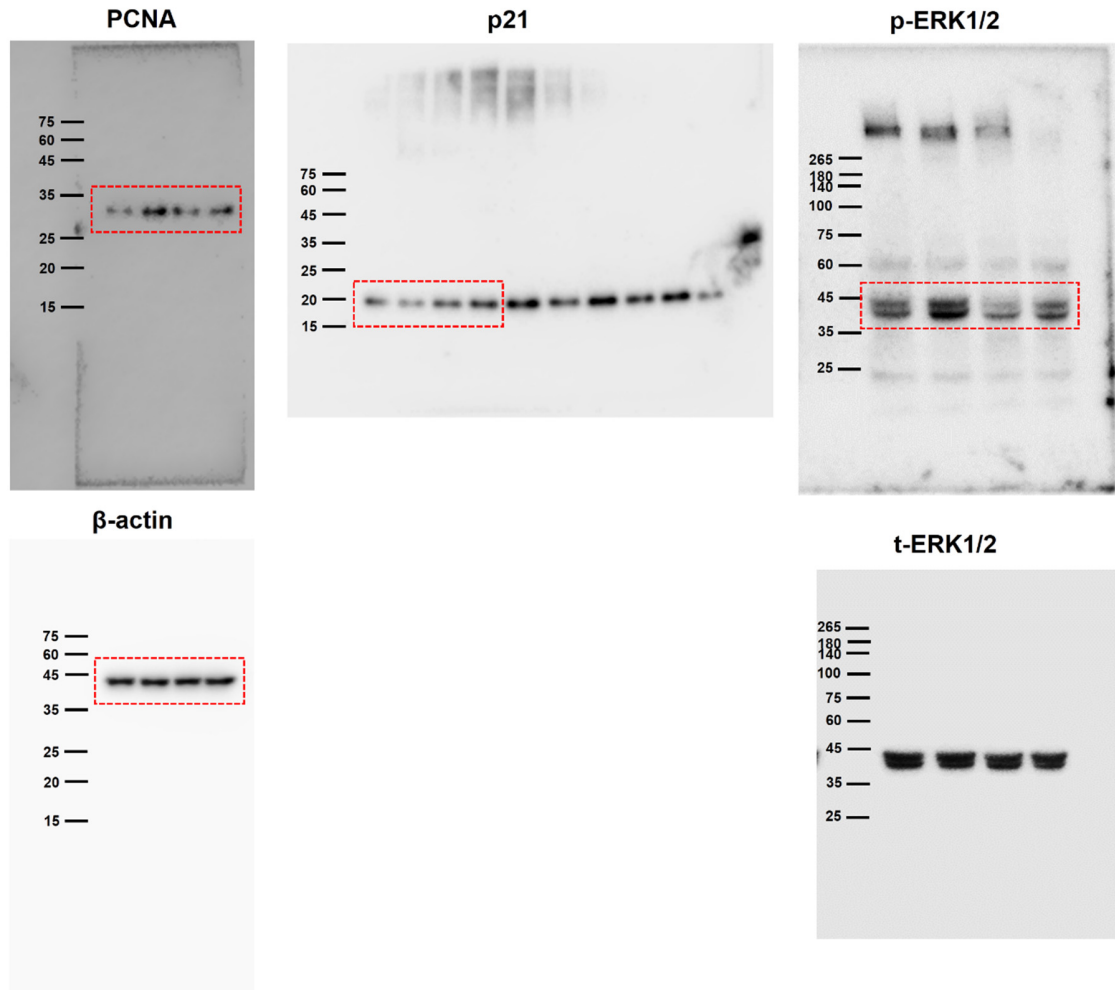

Supplementary Figure 16. Full western blot images for PCNA, p32, phospho-ERK1/2, total-ERK1/2, and the respective  $\beta$ -actin control bands in Figure 2E. The red dotted rectangle indicates the area shown in Fig. 2E.

**Supplementary Figure 17.**

**Fig. 2G**

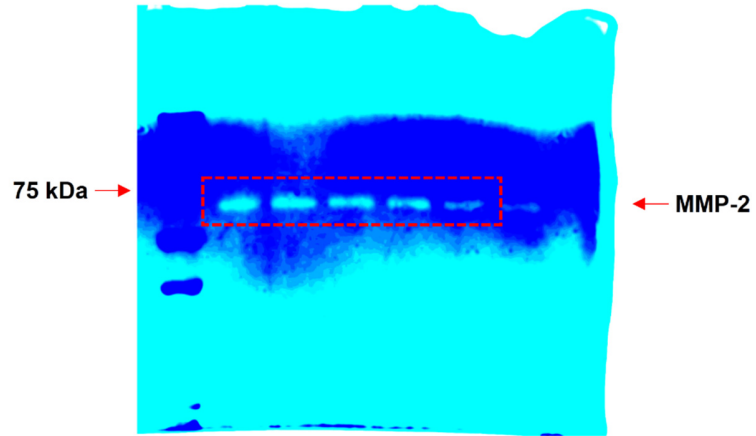

**Supplementary Figure 17. Full gelatin zymography gel image for MMP activity in Figure 2G. The red dotted rectangle indicates the area shown in Fig. 2G.**



## **Supplementary Tables**

**Supplementary Table 1. Fold-change expression of endothelial genes in hIL-32 $\alpha$ -Tg mice LCA compared to non-Tg LCA *in vivo*.**

| Probe ID | Gene Symbol  | IL-32 $\alpha$ LCA-1 | IL-32 $\alpha$ LCA-2 | IL-32 $\alpha$ LCA-3 | Non-Tg LCA-1 | Non-Tg LCA-2 | Non-Tg LCA-3 | IL-32 $\alpha$ LCA/Non-Tg LCA<br>(Fold-Changes) | p-value  |
|----------|--------------|----------------------|----------------------|----------------------|--------------|--------------|--------------|-------------------------------------------------|----------|
| 17459423 | ---          | 59.41696461          | 80.90236656          | 78.762773            | 6.642581391  | 5.161223121  | 8.978534601  | 10.542                                          | 1.19E-04 |
| 17248276 | Hba-a2       | 342.9277874          | 461.0578596          | 445.9332609          | 37.32493907  | 38.67544537  | 49.39444851  | 9.968                                           | 9.14E-05 |
| 17491193 | Saa3         | 36.63223957          | 37.15622425          | 31.47176096          | 6.270571777  | 7.073464484  | 6.001890507  | 5.441                                           | 4.21E-05 |
| 17290010 | Esm1         | 180.5427904          | 220.3180675          | 228.9462302          | 43.32503471  | 42.43812466  | 46.88085577  | 4.748                                           | 3.42E-05 |
| 17302054 | Snora31      | 150.796486           | 206.1879198          | 170.0398404          | 40.59508049  | 34.22356156  | 38.39738084  | 4.655                                           | 1.15E-04 |
| 17227892 | Prg4         | 61.00155018          | 80.53148322          | 77.45690765          | 17.85330172  | 22.94630575  | 17.5222605   | 3.755                                           | 2.39E-04 |
| 17236182 | Timp3        | 264.5308186          | 351.5239071          | 314.3382444          | 83.6673595   | 101.1526987  | 90.26301101  | 3.382                                           | 2.30E-04 |
| 17467458 | ---          | 16.45858041          | 8.925704224          | 12.6568106           | 3.413718271  | 3.934390073  | 4.091321755  | 3.325                                           | 1.03E-02 |
| 17284460 | ---          | 6.305164454          | 14.09138             | 16.1931528           | 3.806977386  | 4.70020278   | 2.921005349  | 3.202                                           | 4.35E-02 |
| 17232731 | Rnu3a        | 69.21280168          | 85.61822373          | 71.39608197          | 18.8826717   | 27.71524777  | 29.11629739  | 2.988                                           | 1.31E-03 |
| 17508591 | Snord13      | 638.6558895          | 707.5013056          | 593.4879797          | 175.3477368  | 259.1455841  | 243.2358382  | 2.862                                           | 1.05E-03 |
| 17547616 | ---          | 20.75508593          | 42.40492714          | 37.18469413          | 11.97940211  | 13.44114373  | 12.1087413   | 2.674                                           | 2.30E-02 |
| 17428477 | Cyp4b1       | 93.78589118          | 76.49327437          | 75.83957635          | 23.30161429  | 36.900079    | 34.89007999  | 2.588                                           | 3.02E-03 |
| 17425523 | Snora17      | 67.49089592          | 70.46075361          | 88.31049526          | 31.75326416  | 33.66606036  | 22.78963637  | 2.565                                           | 1.82E-03 |
| 17300929 | ---          | 83.81514206          | 66.92410337          | 90.45021331          | 29.9198907   | 31.47754235  | 32.78863641  | 2.561                                           | 9.29E-04 |
| 17225169 | Snora75      | 70.01504209          | 84.42503692          | 84.09003847          | 28.69988399  | 29.44004558  | 36.37652939  | 2.524                                           | 4.83E-04 |
| 17469339 | ---          | 18.07946398          | 9.028854731          | 15.45940619          | 5.872044901  | 5.217797663  | 6.170498303  | 2.466                                           | 2.86E-02 |
| 17218927 | Dpt          | 14.58304412          | 16.19661023          | 17.34164678          | 6.129481331  | 7.595258148  | 6.315259426  | 2.401                                           | 3.74E-04 |
| 17387517 | Serpig1      | 31.41659671          | 38.9540115           | 30.10126057          | 12.78716908  | 15.02438466  | 15.09442609  | 2.342                                           | 1.18E-03 |
| 17280493 | ---          | 125.9595763          | 136.0514007          | 121.6465842          | 50.65848405  | 65.13576426  | 48.58876977  | 2.334                                           | 8.73E-04 |
| 17385838 | ---          | 24.22392939          | 35.48912255          | 25.1584825           | 9.490742765  | 11.54305344  | 15.78261108  | 2.305                                           | 1.13E-02 |
| 17419405 | Snora16a     | 115.8920666          | 111.9112297          | 107.8259039          | 46.915346    | 49.71550649  | 54.96094862  | 2.214                                           | 7.14E-05 |
| 17399176 | 583041710Rik | 27.75177223          | 16.42275202          | 15.66666286          | 11.73149525  | 6.600123408  | 8.801216828  | 2.205                                           | 4.36E-02 |
| 17547719 | Ahnak2       | 54.43882413          | 84.89949104          | 76.34686435          | 31.8842712   | 33.94400756  | 32.38747294  | 2.196                                           | 5.90E-03 |
| 17383129 | Snora17      | 112.4861057          | 112.4081633          | 106.2909533          | 43.35321259  | 57.72718618  | 50.88543973  | 2.179                                           | 5.08E-04 |
| 17284334 | Ighg         | 10.82002554          | 9.971503154          | 8.084580972          | 5.184443004  | 4.399211613  | 3.802177806  | 2.157                                           | 4.37E-03 |
| 17281142 | Ctl2         | 396.033044           | 414.3318743          | 458.539752           | 196.2629445  | 198.9153775  | 198.9088973  | 2.136                                           | 5.50E-05 |
| 17401066 | Ngf          | 58.28274815          | 75.07340429          | 83.60903808          | 28.66864871  | 40.91383876  | 32.11599302  | 2.133                                           | 6.79E-03 |
| 17301340 | ---          | 69.67103064          | 75.59489993          | 105.5068604          | 29.60487793  | 38.23743913  | 50.41848979  | 2.121                                           | 1.70E-02 |
| 17513854 | ---          | 77.94469879          | 92.4222944           | 111.1197925          | 50.35094674  | 35.67792978  | 48.36474878  | 2.094                                           | 7.25E-03 |
| 17276906 | Smoc1        | 172.8334917          | 200.5078625          | 171.3980636          | 81.70151922  | 88.6642738   | 91.6469523   | 2.079                                           | 2.10E-04 |
| 17257591 | Snord104     | 234.4060507          | 235.3682645          | 225.9434619          | 94.53980606  | 119.0483653  | 121.5333122  | 2.076                                           | 5.96E-04 |
| 17512852 | ---          | 56.63547115          | 54.97093068          | 48.06687145          | 32.36088146  | 22.26911006  | 22.69439306  | 2.065                                           | 4.03E-03 |

  

| Probe Set ID | Gene Symbol   | IL-32 $\alpha$ LCA-1 | IL-32 $\alpha$ LCA-2 | IL-32 $\alpha$ LCA-3 | Non-Tg LCA-1 | Non-Tg LCA-2 | Non-Tg LCA-3 | IL-32 $\alpha$ LCA/Non-Tg LCA<br>Fold-Changes | p-value     |
|--------------|---------------|----------------------|----------------------|----------------------|--------------|--------------|--------------|-----------------------------------------------|-------------|
| 17358266     | Pgm5          | 13.55672695          | 13.25979899          | 10.23648143          | 93.62494104  | 119.7442856  | 170.8802675  | 0.096429554                                   | 4.98E-04    |
| 17528586     | Ccnb2         | 12.4519346           | 21.09593316          | 19.74847027          | 136.7301886  | 165.4919234  | 160.3906242  | 0.115207243                                   | 5.67E-05    |
| 17277876     | ---           | 15.40183136          | 21.07313425          | 23.05094513          | 123.622197   | 130.8441851  | 147.3420081  | 0.148145017                                   | 4.94E-05    |
| 17504138     | Ccl17         | 6.359811475          | 8.058693703          | 8.504208687          | 50.59005842  | 55.24216667  | 47.52421857  | 0.149473431                                   | 1.54E-05    |
| 17483615     | Itgax         | 10.7753513           | 18.03351848          | 17.15566328          | 65.35741417  | 94.01975396  | 93.82652962  | 0.18153184                                    | 8.21E-04    |
| 17514495     | Mmp12         | 7.375930183          | 11.76409146          | 9.109949142          | 41.62669173  | 55.14235585  | 57.58287833  | 0.183023118                                   | 3.53E-04    |
| 17321768     | ---           | 29.74390165          | 49.38664295          | 37.04453964          | 231.0156854  | 194.9964434  | 202.8984453  | 0.18472433                                    | 2.17E-04    |
| 17454166     | Pilra         | 14.46006367          | 16.32446719          | 21.13808827          | 83.9196642   | 83.30908919  | 106.4897675  | 0.189693481                                   | 0.00020295  |
| 17271724     | Cd300ld       | 21.32531283          | 31.37250884          | 27.8649952           | 135.7728304  | 122.4550957  | 135.9541142  | 0.204379725                                   | 8.96E-05    |
| 17277794     | Gpr65         | 8.773235528          | 9.841976011          | 11.12949325          | 40.54482836  | 60.14025167  | 43.58331413  | 0.206176169                                   | 0.000671995 |
| 17325608     | Cd80          | 46.94865752          | 63.323057            | 43.70934943          | 251.7972995  | 220.0262739  | 271.8580993  | 0.207052385                                   | 0.000193798 |
| 17404217     | LOC10003894   | 11.63237678          | 23.34223825          | 11.95284382          | 52.81090649  | 77.57565135  | 92.48810976  | 0.210555373                                   | 0.003885379 |
| 17490149     | Cd33 // Cd33  | 46.1102953           | 80.28814076          | 92.56391631          | 362.6273677  | 342.1601655  | 321.1910762  | 0.213418048                                   | 0.001290414 |
| 17405082     | Slc7a11       | 6.381355909          | 8.533573454          | 6.332025213          | 24.71186518  | 36.46958809  | 37.90932859  | 0.214419083                                   | 0.001559442 |
| 17260474     | Igfbp3        | 17.03435009          | 36.11962476          | 27.14229863          | 99.41578276  | 112.8528467  | 155.7943388  | 0.218159066                                   | 2.69E-03    |
| 17248809     | Havcr2        | 11.55534957          | 17.66665499          | 13.94153008          | 51.35276312  | 67.55759195  | 77.38312039  | 0.219892865                                   | 7.22E-04    |
| 17418485     | Csf3r         | 79.17653352          | 101.8766066          | 104.2935408          | 378.6176877  | 424.9752462  | 467.3880377  | 0.224509011                                   | 0.000159703 |
| 17485510     | Tarm1         | 40.81526729          | 48.34282912          | 46.23245281          | 190.0072951  | 190.7963815  | 220.2511894  | 0.225254892                                   | 2.38E-05    |
| 17212174     | Il1r2         | 35.2749712           | 35.89569685          | 37.49374425          | 141.7595383  | 166.1634194  | 173.4154948  | 0.225754688                                   | 2.66E-05    |
| 17333731     | Fpr2          | 4.257300719          | 3.369968252          | 3.232505893          | 21.37608878  | 12.44877605  | 14.15128346  | 0.226357789                                   | 6.98E-03    |
| 17494370     | Trim30b       | 6.948063793          | 6.471189835          | 5.177038331          | 24.86076869  | 31.79449303  | 24.85646102  | 0.228142546                                   | 0.000393958 |
| 17517097     | 1600029D21Ri  | 7.92160629           | 8.496513734          | 8.224961923          | 28.54564983  | 43.43915096  | 35.95655755  | 0.228300647                                   | 6.38E-04    |
| 17325324     | Stfa21l       | 9.086205911          | 12.41394712          | 11.28135926          | 40.25346305  | 46.83983212  | 52.22841438  | 0.235293641                                   | 0.000216839 |
| 17408856     | I830077J02Rik | 26.8826415           | 34.9792633           | 36.66376402          | 142.9644861  | 119.4591871  | 143.8987251  | 0.24248151                                    | 0.000194631 |
| 17536383     | F630028O10R   | 19.05571716          | 33.93927872          | 30.5374142           | 114.4589923  | 123.0994922  | 106.6847385  | 0.242655206                                   | 6.48E-04    |









|          |                |             |             |             |             |             |             |             |             |
|----------|----------------|-------------|-------------|-------------|-------------|-------------|-------------|-------------|-------------|
| 17262065 | Cyfp2          | 11.33125695 | 7.029241394 | 10.70969879 | 20.15842474 | 21.60505502 | 18.65817533 | 0.481122159 | 0.004234064 |
| 17501311 | ---            | 50.69343431 | 52.02769906 | 52.37447601 | 126.0935789 | 88.75989157 | 106.5412277 | 0.482570529 | 0.00277724  |
| 17400599 | Txnip          | 238.6912714 | 262.007264  | 268.2116327 | 528.2975833 | 525.7914967 | 537.0028743 | 0.483259416 | 4.56E-05    |
| 17338378 | Trem14         | 16.80800976 | 19.62175256 | 24.02770581 | 30.72923614 | 43.91077219 | 50.38568483 | 0.483560352 | 0.017313072 |
| 17316956 | Trps1          | 15.1312262  | 22.24035637 | 20.08467206 | 31.84303627 | 40.58748384 | 46.33710478 | 0.483770343 | 0.008660136 |
| 17532257 | Csrp1          | 15.72595799 | 16.12032584 | 19.92541683 | 37.89351329 | 36.42439236 | 32.52508676 | 0.484558692 | 0.000903211 |
| 17505148 | Cdh1           | 12.05703278 | 11.60949248 | 11.72554439 | 23.21069794 | 22.93264728 | 26.75480298 | 0.485500256 | 0.000249658 |
| 17374632 | D2Erd750e      | 19.11905087 | 17.37145872 | 14.2268563  | 32.11770717 | 35.89223856 | 36.42095887 | 0.48565476  | 0.001241064 |
| 17276776 | Arg2           | 14.79312557 | 16.64280843 | 16.50953979 | 31.25744605 | 37.10037849 | 30.23913571 | 0.486277403 | 0.000729789 |
| 17219248 | Adams4         | 11.54453373 | 10.40549722 | 8.18116331  | 24.64981647 | 14.06025642 | 23.14314459 | 0.487140289 | 0.033949554 |
| 17454179 | Pilrb1         | 16.8029193  | 15.52297313 | 14.56338683 | 27.82380844 | 35.09739379 | 33.29422377 | 0.487336399 | 0.001436232 |
| 17229782 | Slamf7         | 11.95994624 | 9.470719284 | 8.683718747 | 19.49542904 | 24.07867332 | 18.19826491 | 0.487505751 | 0.005647957 |
| 17406279 | Tlr2           | 12.08051455 | 15.14716612 | 15.57067951 | 22.90498956 | 28.28930836 | 36.56706676 | 0.487667441 | 0.015318361 |
| 17232112 | H60a // H60a   | 7.582433815 | 6.193010963 | 7.638985219 | 11.36779864 | 14.41531043 | 18.11316811 | 0.487841598 | 0.016340595 |
| 17471528 | Clec1a         | 12.0034482  | 20.1823463  | 22.96793106 | 28.90772159 | 39.40183733 | 44.60343765 | 0.488462154 | 0.028491344 |
| 17391056 | Atp8b4         | 5.65162601  | 9.948437817 | 9.277441507 | 15.9875393  | 18.43742148 | 16.47817998 | 0.488722404 | 0.00570665  |
| 17261107 | Rel            | 25.91398532 | 36.98963091 | 43.35062836 | 72.873784   | 73.52846693 | 70.8517214  | 0.489078489 | 0.005559218 |
| 17373550 | Trp53i11       | 19.69219465 | 26.64847371 | 20.81693842 | 43.98699071 | 45.66493897 | 47.53456326 | 0.489535124 | 0.001266611 |
| 17400555 | Hist2h3c2 // H | 48.39077031 | 50.14100472 | 51.7945358  | 102.3038054 | 112.9538786 | 91.66785436 | 0.489781045 | 0.000516886 |
| 17430861 | Sesn2          | 12.76696766 | 9.696364952 | 7.748102288 | 18.42270497 | 22.66221545 | 20.57145596 | 0.489996926 | 0.006583059 |
| 17285867 | Hist1h2ab      | 4.787840195 | 4.453380864 | 5.629871525 | 6.754626513 | 11.39138295 | 12.19144308 | 0.490189233 | 0.037324276 |
| 17321597 | Racgap1        | 14.21409163 | 12.53201069 | 12.22519863 | 23.47053788 | 21.79709548 | 34.2006064  | 0.490400958 | 0.014593916 |
| 17302141 | Epst1          | 13.2500693  | 13.27377666 | 9.47747667  | 18.18992892 | 28.49604906 | 26.70733281 | 0.490525938 | 0.017099334 |
| 17436607 | Sh3bp2         | 15.37301252 | 15.6097443  | 14.61714856 | 27.3896704  | 26.95027333 | 38.61498752 | 0.490559293 | 0.007922712 |
| 17532137 | Myd88          | 39.6674843  | 35.87719016 | 34.3238148  | 69.55175434 | 68.1920665  | 86.12970591 | 0.490761417 | 0.001823127 |
| 17451297 | Adrbk2         | 10.36028654 | 9.804037483 | 7.536715844 | 15.26115238 | 22.75211883 | 18.40070325 | 0.491031524 | 0.009080079 |
| 17432674 | Tnfrsf1b       | 28.04072994 | 41.68446749 | 30.42674289 | 65.05797444 | 75.62047467 | 63.20649894 | 0.491217921 | 0.005259261 |
| 17454187 | Pilrb2         | 8.92146107  | 7.956213552 | 7.57668096  | 17.53419145 | 20.97649892 | 11.22558714 | 0.491680456 | 0.038764507 |
| 17312341 | Grina          | 98.4731839  | 112.1604319 | 95.64383014 | 194.3282723 | 220.3173039 | 208.1468622 | 0.491780932 | 0.000265231 |
| 17317486 | Fam49b         | 64.35302229 | 59.08811212 | 74.97158511 | 116.3753745 | 151.6420442 | 135.2683024 | 0.49199044  | 0.002224009 |
| 17338388 | Trem12         | 4.565921322 | 6.849311623 | 6.170960243 | 9.174630145 | 13.62286273 | 12.90635761 | 0.492557328 | 0.016853053 |
| 17454283 | BC037034       | 25.75034756 | 19.52252832 | 26.1724849  | 39.70384988 | 43.63618285 | 61.69561292 | 0.492605528 | 0.015538089 |
| 17309935 | Dab2           | 59.91569237 | 66.61194488 | 72.05696588 | 144.7170405 | 131.2141048 | 126.8147722 | 0.493076638 | 0.000555823 |
| 17324745 | Bex6 // Bex6   | 4.582913322 | 4.810983995 | 3.437028942 | 5.753991142 | 9.98301781  | 10.22884964 | 0.494146042 | 0.04093412  |
| 17321078 | Vdr            | 11.28541057 | 13.05136684 | 15.41839833 | 26.81460321 | 27.12766559 | 26.47535273 | 0.49435901  | 0.000690923 |
| 17449939 | Anrx2          | 32.31578204 | 35.10152974 | 40.12156566 | 64.25442917 | 73.4991673  | 79.5890472  | 0.494789589 | 0.001082409 |
| 17277387 | Fos            | 24.62379123 | 36.30750781 | 28.35411064 | 50.30280691 | 60.69038216 | 69.26084098 | 0.495331004 | 0.007773755 |
| 17236787 | Btg1           | 43.31581629 | 50.0679333  | 56.8324892  | 94.80366973 | 110.7808728 | 97.61344709 | 0.495439429 | 0.001234206 |
| 17548348 | Actg1 // Actg1 | 106.138702  | 122.6335573 | 136.4892956 | 245.0421296 | 251.8041063 | 239.8949537 | 0.495780011 | 0.000500888 |
| 17294738 | Vcan           | 24.01471863 | 25.10834444 | 24.61839836 | 39.80202701 | 55.05554618 | 53.78988502 | 0.496082895 | 0.003350976 |
| 17283380 | Fbln5          | 105.1648666 | 109.9353841 | 103.5836866 | 195.9568235 | 214.2857346 | 230.0242256 | 0.497736171 | 0.000101105 |
| 17489304 | Ffar2          | 8.890151471 | 9.50103709  | 7.672990667 | 17.51395494 | 14.08279707 | 20.74891511 | 0.497924292 | 0.009809245 |
| 17284247 | Gpr132         | 16.30066594 | 15.46635149 | 24.02092829 | 34.02386192 | 31.12554083 | 46.62190339 | 0.499125828 | 0.02234895  |
| 17246803 | Osm            | 13.16298697 | 13.41728625 | 12.98597111 | 21.5469386  | 22.4819458  | 35.23814317 | 0.499151356 | 0.024790684 |
| 17391920 | Rassf2         | 16.44210378 | 18.27266303 | 15.22186262 | 32.72993881 | 29.57132536 | 37.67929326 | 0.499463403 | 0.001603643 |
| 17494081 | Rhog           | 53.24418254 | 63.24563464 | 58.72634723 | 106.6135501 | 117.4928374 | 126.6753496 | 0.499501958 | 0.000548526 |
| 17379938 | Cebpb          | 28.99809054 | 28.83118041 | 26.32393026 | 60.67229589 | 48.89232137 | 58.84573701 | 0.499691373 | 0.001250896 |

**Supplementary Table 2. Correlation coefficients and p-values between co-expression modules and human IL-32 $\alpha$ .**

| <b>Module</b>                      | <b>R</b>     | <b>P-value</b> |
|------------------------------------|--------------|----------------|
| IL32 $\alpha$ _M1                  | 0.28         | 0.59           |
| IL32 $\alpha$ _M2                  | 0.70         | 0.12           |
| IL32 $\alpha$ _M3                  | 0.05         | 0.93           |
| IL32 $\alpha$ _M4                  | 0.03         | 0.96           |
| IL32 $\alpha$ _M5                  | 0.28         | 0.60           |
| IL32 $\alpha$ _M6                  | 0.72         | 0.11           |
| IL32 $\alpha$ _M7                  | 0.19         | 0.72           |
| IL32 $\alpha$ _M8                  | -0.43        | 0.40           |
| IL32 $\alpha$ _M9                  | -0.22        | 0.68           |
| IL32 $\alpha$ _M10                 | -0.74        | 0.09           |
| IL32 $\alpha$ _M11                 | -0.67        | 0.15           |
| IL32 $\alpha$ _M12                 | -0.59        | 0.22           |
| IL32 $\alpha$ _M13                 | -0.38        | 0.46           |
| <b>IL32<math>\alpha</math>_M14</b> | <b>-0.90</b> | <b>0.01</b>    |
| IL32 $\alpha$ _M15                 | 0.11         | 0.84           |
| IL32 $\alpha$ _M16                 | 0.63         | 0.18           |
| IL32 $\alpha$ _M17                 | -0.04        | 0.95           |
| IL32 $\alpha$ _M18                 | -0.11        | 0.83           |
| IL32 $\alpha$ _M19                 | 0.00         | 1.00           |
| IL32 $\alpha$ _M20                 | 0.11         | 0.84           |
| IL32 $\alpha$ _M21                 | 0.55         | 0.26           |
| IL32 $\alpha$ _M22                 | 0.46         | 0.36           |
| IL32 $\alpha$ _M23                 | 0.08         | 0.87           |



**Supplementary Table 3. Biological processes enriched in the genes in the IL32 $\alpha$ \_M14 module**

| <b>Term</b>                                                                                                                          | <b>Count</b> | <b>p-Value</b> |
|--------------------------------------------------------------------------------------------------------------------------------------|--------------|----------------|
| GO:0006955~immune response                                                                                                           | 121          | 1.21E-20       |
| GO:0001775~cell activation                                                                                                           | 72           | 1.58E-15       |
| GO:0045321~leukocyte activation                                                                                                      | 63           | 2.61E-13       |
| GO:0007242~intracellular signaling cascade                                                                                           | 168          | 7.63E-13       |
| GO:0002684~positive regulation of immune system process                                                                              | 58           | 6.72E-12       |
| GO:0006952~defense response                                                                                                          | 97           | 1.16E-11       |
| GO:0046649~lymphocyte activation                                                                                                     | 53           | 1.09E-10       |
| GO:0006954~inflammatory response                                                                                                     | 57           | 8.71E-10       |
| GO:0006796~phosphate metabolic process                                                                                               | 149          | 2.29E-09       |
| GO:0006793~phosphorus metabolic process                                                                                              | 149          | 2.29E-09       |
| GO:0050865~regulation of cell activation                                                                                             | 44           | 2.94E-09       |
| GO:0016310~phosphorylation                                                                                                           | 128          | 4.17E-09       |
| GO:0002694~regulation of leukocyte activation                                                                                        | 43           | 6.33E-09       |
| GO:0042110~T cell activation                                                                                                         | 36           | 6.73E-09       |
| GO:0009611~response to wounding                                                                                                      | 74           | 8.27E-09       |
| GO:0048534~hemopoietic or lymphoid organ development                                                                                 | 63           | 1.74E-08       |
| GO:0002252~immune effector process                                                                                                   | 37           | 2.03E-08       |
| GO:0051249~regulation of lymphocyte activation                                                                                       | 40           | 2.70E-08       |
| GO:0002520~immune system development                                                                                                 | 64           | 4.88E-08       |
| GO:0050778~positive regulation of immune response                                                                                    | 38           | 5.36E-08       |
| GO:0006935~chemotaxis                                                                                                                | 33           | 6.09E-08       |
| GO:0042330~taxis                                                                                                                     | 33           | 6.09E-08       |
| GO:0006468~protein amino acid phosphorylation                                                                                        | 113          | 6.49E-08       |
| GO:0002250~adaptive immune response                                                                                                  | 28           | 8.24E-08       |
| GO:0002460~adaptive immune response based on somatic recombination of immune receptors built from immunoglobulin superfamily domains | 28           | 8.24E-08       |
| GO:0001817~regulation of cytokine production                                                                                         | 38           | 9.93E-08       |
| GO:0043067~regulation of programmed cell death                                                                                       | 101          | 1.26E-07       |
| GO:0045087~innate immune response                                                                                                    | 32           | 1.36E-07       |
| GO:0010941~regulation of cell death                                                                                                  | 101          | 1.64E-07       |
| GO:0019884~antigen processing and presentation of exogenous antigen                                                                  | 15           | 2.23E-07       |
| GO:0042981~regulation of apoptosis                                                                                                   | 99           | 2.44E-07       |
| GO:0030097~hemopoiesis                                                                                                               | 55           | 3.43E-07       |
| GO:0050867~positive regulation of cell activation                                                                                    | 30           | 4.22E-07       |
| GO:0002449~lymphocyte mediated immunity                                                                                              | 25           | 6.18E-07       |
| GO:0048584~positive regulation of response to stimulus                                                                               | 44           | 7.07E-07       |
| GO:0002764~immune response-regulating signal transduction                                                                            | 20           | 7.43E-07       |
| GO:0044092~negative regulation of molecular function                                                                                 | 35           | 7.49E-07       |
| GO:0019886~antigen processing and presentation of exogenous peptide antigen via MHC class II                                         | 11           | 8.18E-07       |
| GO:0002495~antigen processing and presentation of peptide antigen via MHC class II                                                   | 11           | 8.18E-07       |
| GO:0002478~antigen processing and presentation of exogenous peptide antigen                                                          | 13           | 9.23E-07       |
| GO:0002757~immune response-activating signal transduction                                                                            | 19           | 9.30E-07       |
| GO:0002696~positive regulation of leukocyte activation                                                                               | 29           | 9.33E-07       |
| GO:0051251~positive regulation of lymphocyte activation                                                                              | 28           | 1.04E-06       |
| GO:0002443~leukocyte mediated immunity                                                                                               | 27           | 1.15E-06       |
| GO:0002237~response to molecule of bacterial origin                                                                                  | 19           | 1.32E-06       |
| GO:0002253~activation of immune response                                                                                             | 26           | 2.03E-06       |
| GO:0009617~response to bacterium                                                                                                     | 38           | 2.55E-06       |
| GO:0002697~regulation of immune effector process                                                                                     | 26           | 3.23E-06       |
| GO:0001816~cytokine production                                                                                                       | 17           | 4.21E-06       |
| GO:0050900~leukocyte migration                                                                                                       | 17           | 4.21E-06       |
| GO:0002521~leukocyte differentiation                                                                                                 | 35           | 4.43E-06       |

|                                                                                                      |    |          |
|------------------------------------------------------------------------------------------------------|----|----------|
| GO:0048002~antigen processing and presentation of peptide antigen                                    | 15 | 6.25E-06 |
| GO:0002504~antigen processing and presentation of peptide or polysaccharide antigen via MHC class II | 11 | 6.97E-06 |
| GO:0007243~protein kinase cascade                                                                    | 49 | 7.84E-06 |
| GO:0030595~leukocyte chemotaxis                                                                      | 13 | 7.89E-06 |
| GO:0060326~cell chemotaxis                                                                           | 13 | 7.89E-06 |
| GO:0070663~regulation of leukocyte proliferation                                                     | 24 | 9.98E-06 |
| GO:0019221~cytokine-mediated signaling pathway                                                       | 19 | 1.17E-05 |
| GO:0042098~T cell proliferation                                                                      | 13 | 1.25E-05 |
| GO:0016477~cell migration                                                                            | 49 | 1.26E-05 |
| GO:0031349~positive regulation of defense response                                                   | 19 | 1.54E-05 |
| GO:0042127~regulation of cell proliferation                                                          | 90 | 1.54E-05 |
| GO:0030029~actin filament-based process                                                              | 39 | 1.67E-05 |
| GO:0030098~lymphocyte differentiation                                                                | 29 | 1.82E-05 |
| GO:0070661~leukocyte proliferation                                                                   | 16 | 2.08E-05 |
| GO:0032943~mononuclear cell proliferation                                                            | 16 | 2.08E-05 |
| GO:0032944~regulation of mononuclear cell proliferation                                              | 23 | 2.18E-05 |
| GO:0050670~regulation of lymphocyte proliferation                                                    | 23 | 2.18E-05 |
| GO:0008283~cell proliferation                                                                        | 49 | 2.76E-05 |
| GO:0002218~activation of innate immune response                                                      | 9  | 2.76E-05 |
| GO:0002703~regulation of leukocyte mediated immunity                                                 | 21 | 2.78E-05 |
| GO:0019724~B cell mediated immunity                                                                  | 20 | 3.08E-05 |
| GO:0002274~myeloid leukocyte activation                                                              | 14 | 3.43E-05 |
| GO:0043068~positive regulation of programmed cell death                                              | 49 | 3.80E-05 |
| GO:0043086~negative regulation of catalytic activity                                                 | 26 | 4.38E-05 |
| GO:0010942~positive regulation of cell death                                                         | 49 | 4.69E-05 |
| GO:0045088~regulation of innate immune response                                                      | 16 | 5.15E-05 |
| GO:0050863~regulation of T cell activation                                                           | 27 | 5.18E-05 |
| GO:0030036~actin cytoskeleton organization                                                           | 36 | 5.23E-05 |
| GO:0007049~cell cycle                                                                                | 97 | 5.82E-05 |
| GO:0042325~regulation of phosphorylation                                                             | 54 | 6.19E-05 |
| GO:0043065~positive regulation of apoptosis                                                          | 48 | 6.38E-05 |
| GO:0051101~regulation of DNA binding                                                                 | 21 | 6.65E-05 |
| GO:0016064~immunoglobulin mediated immune response                                                   | 19 | 6.90E-05 |
| GO:0046651~lymphocyte proliferation                                                                  | 15 | 6.94E-05 |
| GO:0042108~positive regulation of cytokine biosynthetic process                                      | 15 | 6.94E-05 |
| GO:0002758~innate immune response-activating signal transduction                                     | 8  | 7.61E-05 |
| GO:0019220~regulation of phosphate metabolic process                                                 | 55 | 8.84E-05 |
| GO:0051174~regulation of phosphorus metabolic process                                                | 55 | 8.84E-05 |
| GO:0009891~positive regulation of biosynthetic process                                               | 89 | 9.79E-05 |
| GO:0007626~locomotory behavior                                                                       | 46 | 1.06E-04 |
| GO:0002706~regulation of lymphocyte mediated immunity                                                | 19 | 1.08E-04 |
| GO:0002768~immune response-regulating cell surface receptor signaling pathway                        | 15 | 1.23E-04 |
| GO:0051726~regulation of cell cycle                                                                  | 42 | 1.43E-04 |
| GO:0030593~neutrophil chemotaxis                                                                     | 9  | 1.66E-04 |
| GO:0009620~response to fungus                                                                        | 9  | 1.66E-04 |
| GO:0001819~positive regulation of cytokine production                                                | 18 | 1.90E-04 |
| GO:0031328~positive regulation of cellular biosynthetic process                                      | 87 | 1.91E-04 |
| GO:0002221~pattern recognition receptor signaling pathway                                            | 7  | 2.11E-04 |
| GO:0010604~positive regulation of macromolecule metabolic process                                    | 97 | 2.16E-04 |
| GO:0002429~immune response-activating cell surface receptor signaling pathway                        | 14 | 2.22E-04 |
| GO:0045089~positive regulation of innate immune response                                             | 13 | 2.28E-04 |
| GO:0048514~blood vessel morphogenesis                                                                | 39 | 2.37E-04 |
| GO:0048870~cell motility                                                                             | 51 | 2.54E-04 |
| GO:0051674~localization of cell                                                                      | 51 | 2.54E-04 |
| GO:0043549~regulation of kinase activity                                                             | 38 | 2.62E-04 |

|                                                                                                                                                    |    |          |
|----------------------------------------------------------------------------------------------------------------------------------------------------|----|----------|
| GO:0051338~regulation of transferase activity                                                                                                      | 39 | 2.64E-04 |
| GO:0042035~regulation of cytokine biosynthetic process                                                                                             | 18 | 2.88E-04 |
| GO:0043388~positive regulation of DNA binding                                                                                                      | 14 | 2.91E-04 |
| GO:0002683~negative regulation of immune system process                                                                                            | 20 | 3.05E-04 |
| GO:0051090~regulation of transcription factor activity                                                                                             | 17 | 3.34E-04 |
| GO:0048585~negative regulation of response to stimulus                                                                                             | 18 | 3.52E-04 |
| GO:0010324~membrane invagination                                                                                                                   | 37 | 3.57E-04 |
| GO:0006897~endocytosis                                                                                                                             | 37 | 3.57E-04 |
| GO:0007010~cytoskeleton organization                                                                                                               | 56 | 3.89E-04 |
| GO:0032496~response to lipopolysaccharide                                                                                                          | 13 | 4.02E-04 |
| GO:0051130~positive regulation of cellular component organization                                                                                  | 27 | 4.25E-04 |
| GO:0006909~phagocytosis                                                                                                                            | 15 | 4.33E-04 |
| GO:0042113~B cell activation                                                                                                                       | 20 | 4.35E-04 |
| GO:0045576~mast cell activation                                                                                                                    | 8  | 4.63E-04 |
| GO:0051240~positive regulation of multicellular organismal process                                                                                 | 33 | 4.72E-04 |
| GO:0006928~cell motion                                                                                                                             | 61 | 5.04E-04 |
| GO:0010557~positive regulation of macromolecule biosynthetic process                                                                               | 82 | 5.41E-04 |
| GO:0051091~positive regulation of transcription factor activity                                                                                    | 12 | 5.53E-04 |
| GO:0051094~positive regulation of developmental process                                                                                            | 40 | 5.84E-04 |
| GO:0001944~vasculature development                                                                                                                 | 45 | 5.84E-04 |
| GO:0002819~regulation of adaptive immune response                                                                                                  | 16 | 5.86E-04 |
| GO:0002822~regulation of adaptive immune response based on somatic recombination of immune receptors built from immunoglobulin superfamily domains | 16 | 5.86E-04 |
| GO:0010648~negative regulation of cell communication                                                                                               | 36 | 5.99E-04 |
| GO:0045859~regulation of protein kinase activity                                                                                                   | 36 | 5.99E-04 |
| GO:0051099~positive regulation of binding                                                                                                          | 14 | 6.13E-04 |
| GO:0000278~mitotic cell cycle                                                                                                                      | 44 | 6.52E-04 |
| GO:0001568~blood vessel development                                                                                                                | 44 | 6.52E-04 |
| GO:0000087~M phase of mitotic cell cycle                                                                                                           | 37 | 6.61E-04 |
| GO:0050764~regulation of phagocytosis                                                                                                              | 10 | 7.33E-04 |
| GO:0051092~positive regulation of NF-kappaB transcription factor activity                                                                          | 10 | 7.33E-04 |
| GO:0045577~regulation of B cell differentiation                                                                                                    | 8  | 7.47E-04 |
| GO:0002700~regulation of production of molecular mediator of immune response                                                                       | 11 | 7.54E-04 |
| GO:0010647~positive regulation of cell communication                                                                                               | 36 | 8.10E-04 |
| GO:0044093~positive regulation of molecular function                                                                                               | 52 | 8.30E-04 |
| GO:0070665~positive regulation of leukocyte proliferation                                                                                          | 15 | 8.36E-04 |
| GO:0030217~T cell differentiation                                                                                                                  | 19 | 8.71E-04 |
| GO:0045619~regulation of lymphocyte differentiation                                                                                                | 16 | 8.74E-04 |
| GO:0010627~regulation of protein kinase cascade                                                                                                    | 31 | 8.90E-04 |
| GO:0050866~negative regulation of cell activation                                                                                                  | 15 | 0.001027 |
| GO:0002695~negative regulation of leukocyte activation                                                                                             | 15 | 0.001027 |
| GO:0030099~myeloid cell differentiation                                                                                                            | 22 | 0.001029 |
| GO:0051173~positive regulation of nitrogen compound metabolic process                                                                              | 80 | 0.001045 |
| GO:0051098~regulation of binding                                                                                                                   | 21 | 0.001092 |
| GO:0009967~positive regulation of signal transduction                                                                                              | 33 | 0.001225 |
| GO:0051254~positive regulation of RNA metabolic process                                                                                            | 66 | 0.001242 |
| GO:0050870~positive regulation of T cell activation                                                                                                | 17 | 0.001269 |
| GO:0032675~regulation of interleukin-6 production                                                                                                  | 11 | 0.001328 |
| GO:0008284~positive regulation of cell proliferation                                                                                               | 48 | 0.001511 |
| GO:0050864~regulation of B cell activation                                                                                                         | 15 | 0.001517 |
| GO:0045123~cellular extravasation                                                                                                                  | 5  | 0.001627 |
| GO:0045597~positive regulation of cell differentiation                                                                                             | 33 | 0.001643 |
| GO:0045893~positive regulation of transcription, DNA-dependent                                                                                     | 65 | 0.001661 |
| GO:0019882~antigen processing and presentation                                                                                                     | 20 | 0.001785 |
| GO:0010628~positive regulation of gene expression                                                                                                  | 74 | 0.001789 |
| GO:0032946~positive regulation of mononuclear cell proliferation                                                                                   | 14 | 0.001797 |

|                                                                                                         |    |          |
|---------------------------------------------------------------------------------------------------------|----|----------|
| GO:0050671~positive regulation of lymphocyte proliferation                                              | 14 | 0.001797 |
| GO:0050766~positive regulation of phagocytosis                                                          | 9  | 0.001867 |
| GO:0050830~defense response to Gram-positive bacterium                                                  | 9  | 0.001867 |
| GO:0007264~small GTPase mediated signal transduction                                                    | 44 | 0.002041 |
| GO:0045941~positive regulation of transcription                                                         | 72 | 0.002076 |
| GO:0042742~defense response to bacterium                                                                | 23 | 0.002105 |
| GO:0006469~negative regulation of protein kinase activity                                               | 14 | 0.00218  |
| GO:0033673~negative regulation of kinase activity                                                       | 14 | 0.00218  |
| GO:0007610~behavior                                                                                     | 63 | 0.002189 |
| GO:0009968~negative regulation of signal transduction                                                   | 32 | 0.002215 |
| GO:0043122~regulation of I-kappaB kinase/NF-kappaB cascade                                              | 12 | 0.002453 |
| GO:0045428~regulation of nitric oxide biosynthetic process                                              | 8  | 0.002468 |
| GO:0002285~lymphocyte activation during immune response                                                 | 8  | 0.002468 |
| GO:0030183~B cell differentiation                                                                       | 13 | 0.002583 |
| GO:0051250~negative regulation of lymphocyte activation                                                 | 14 | 0.002628 |
| GO:0008285~negative regulation of cell proliferation                                                    | 39 | 0.002629 |
| GO:0043405~regulation of MAP kinase activity                                                            | 19 | 0.002901 |
| GO:0006917~induction of apoptosis                                                                       | 31 | 0.002978 |
| GO:0012502~induction of programmed cell death                                                           | 31 | 0.002978 |
| GO:0007265~Ras protein signal transduction                                                              | 15 | 0.00309  |
| GO:0042129~regulation of T cell proliferation                                                           | 15 | 0.00309  |
| GO:0051607~defense response to virus                                                                    | 7  | 0.003134 |
| GO:0032655~regulation of interleukin-12 production                                                      | 7  | 0.003134 |
| GO:0002712~regulation of B cell mediated immunity                                                       | 10 | 0.003141 |
| GO:0002889~regulation of immunoglobulin mediated immune response                                        | 10 | 0.003141 |
| GO:0051348~negative regulation of transferase activity                                                  | 14 | 0.003148 |
| GO:0008219~cell death                                                                                   | 75 | 0.003163 |
| GO:0016044~membrane organization                                                                        | 45 | 0.003269 |
| GO:0007067~mitosis                                                                                      | 34 | 0.003323 |
| GO:0000280~nuclear division                                                                             | 34 | 0.003323 |
| GO:0002335~mature B cell differentiation                                                                | 5  | 0.003475 |
| GO:0051301~cell division                                                                                | 46 | 0.003595 |
| GO:0032844~regulation of homeostatic process                                                            | 15 | 0.003643 |
| GO:0032494~response to peptidoglycan                                                                    | 6  | 0.003666 |
| GO:0051640~organelle localization                                                                       | 14 | 0.003749 |
| GO:0045935~positive regulation of nucleobase, nucleoside, nucleotide and nucleic acid metabolic process | 75 | 0.003757 |
| GO:0016265~death                                                                                        | 76 | 0.003857 |
| GO:0043069~negative regulation of programmed cell death                                                 | 41 | 0.00386  |
| GO:0000279~M phase                                                                                      | 46 | 0.004116 |
| GO:0060548~negative regulation of cell death                                                            | 41 | 0.004151 |
| GO:0051347~positive regulation of transferase activity                                                  | 26 | 0.004233 |
| GO:0010876~lipid localization                                                                           | 25 | 0.004254 |
| GO:0012501~programmed cell death                                                                        | 70 | 0.004331 |
| GO:0050871~positive regulation of B cell activation                                                     | 11 | 0.004373 |
| GO:0050777~negative regulation of immune response                                                       | 9  | 0.004448 |
| GO:0043392~negative regulation of DNA binding                                                           | 9  | 0.004448 |
| GO:0030101~natural killer cell activation                                                               | 7  | 0.004565 |
| GO:0043487~regulation of RNA stability                                                                  | 7  | 0.004565 |
| GO:0009142~nucleoside triphosphate biosynthetic process                                                 | 20 | 0.005052 |
| GO:0032649~regulation of interferon-gamma production                                                    | 10 | 0.005065 |
| GO:0033674~positive regulation of kinase activity                                                       | 25 | 0.005209 |
| GO:0006754~ATP biosynthetic process                                                                     | 18 | 0.005336 |
| GO:0030003~cellular cation homeostasis                                                                  | 28 | 0.005468 |
| GO:0044087~regulation of cellular component biogenesis                                                  | 19 | 0.00554  |
| GO:0032680~regulation of tumor necrosis factor production                                               | 9  | 0.00574  |

|                                                                                                                                                             |     |          |
|-------------------------------------------------------------------------------------------------------------------------------------------------------------|-----|----------|
| GO:0048285~organelle fission                                                                                                                                | 34  | 0.005878 |
| GO:0046034~ATP metabolic process                                                                                                                            | 19  | 0.006252 |
| GO:0043123~positive regulation of I-kappaB kinase/NF-kappaB cascade                                                                                         | 10  | 0.006317 |
| GO:0045059~positive thymic T cell selection                                                                                                                 | 5   | 0.006364 |
| GO:0050732~negative regulation of peptidyl-tyrosine phosphorylation                                                                                         | 5   | 0.006364 |
| GO:0007059~chromosome segregation                                                                                                                           | 15  | 0.006713 |
| GO:0007249~I-kappaB kinase/NF-kappaB cascade                                                                                                                | 9   | 0.007298 |
| GO:0010638~positive regulation of organelle organization                                                                                                    | 13  | 0.007523 |
| GO:0030005~cellular di-, tri-valent inorganic cation homeostasis                                                                                            | 25  | 0.007654 |
| GO:0043254~regulation of protein complex assembly                                                                                                           | 15  | 0.007736 |
| GO:0051656~establishment of organelle localization                                                                                                          | 10  | 0.007794 |
| GO:0045807~positive regulation of endocytosis                                                                                                               | 10  | 0.007794 |
| GO:0045621~positive regulation of lymphocyte differentiation                                                                                                | 10  | 0.007794 |
| GO:0002699~positive regulation of immune effector process                                                                                                   | 12  | 0.007802 |
| GO:0002708~positive regulation of lymphocyte mediated immunity                                                                                              | 11  | 0.007922 |
| GO:0002705~positive regulation of leukocyte mediated immunity                                                                                               | 11  | 0.007922 |
| GO:0043066~negative regulation of apoptosis                                                                                                                 | 39  | 0.007924 |
| GO:0051051~negative regulation of transport                                                                                                                 | 16  | 0.008183 |
| GO:0002823~negative regulation of adaptive immune response based on somatic recombination of immune receptors built from immunoglobulin superfamily domains | 6   | 0.008512 |
| GO:0043488~regulation of mRNA stability                                                                                                                     | 6   | 0.008512 |
| GO:0050854~regulation of antigen receptor-mediated signaling pathway                                                                                        | 6   | 0.008512 |
| GO:0042089~cytokine biosynthetic process                                                                                                                    | 6   | 0.008512 |
| GO:0002820~negative regulation of adaptive immune response                                                                                                  | 6   | 0.008512 |
| GO:0019915~lipid storage                                                                                                                                    | 6   | 0.008512 |
| GO:0032755~positive regulation of interleukin-6 production                                                                                                  | 7   | 0.008782 |
| GO:0043408~regulation of MAPKKK cascade                                                                                                                     | 19  | 0.008844 |
| GO:0009206~purine ribonucleoside triphosphate biosynthetic process                                                                                          | 19  | 0.008844 |
| GO:0009201~ribonucleoside triphosphate biosynthetic process                                                                                                 | 19  | 0.008844 |
| GO:0009152~purine ribonucleotide biosynthetic process                                                                                                       | 21  | 0.008879 |
| GO:0045449~regulation of transcription                                                                                                                      | 271 | 0.009062 |
| GO:0006334~nucleosome assembly                                                                                                                              | 16  | 0.00931  |
| GO:0022403~cell cycle phase                                                                                                                                 | 50  | 0.009477 |
| GO:0050672~negative regulation of lymphocyte proliferation                                                                                                  | 10  | 0.00952  |
| GO:0032945~negative regulation of mononuclear cell proliferation                                                                                            | 10  | 0.00952  |
| GO:0070664~negative regulation of leukocyte proliferation                                                                                                   | 10  | 0.00952  |
| GO:0006915~apoptosis                                                                                                                                        | 67  | 0.009554 |
| GO:0009145~purine nucleoside triphosphate biosynthetic process                                                                                              | 19  | 0.009878 |
| GO:0009205~purine ribonucleoside triphosphate metabolic process                                                                                             | 20  | 0.009888 |
| GO:0006323~DNA packaging                                                                                                                                    | 20  | 0.009888 |
| GO:0022402~cell cycle process                                                                                                                               | 58  | 0.010037 |
| GO:0045351~type I interferon biosynthetic process                                                                                                           | 4   | 0.010294 |
| GO:0032606~type I interferon production                                                                                                                     | 4   | 0.010294 |
| GO:0002312~B cell activation during immune response                                                                                                         | 4   | 0.010294 |
| GO:0002313~mature B cell differentiation during immune response                                                                                             | 4   | 0.010294 |
| GO:0045736~negative regulation of cyclin-dependent protein kinase activity                                                                                  | 5   | 0.010495 |
| GO:0045075~regulation of interleukin-12 biosynthetic process                                                                                                | 5   | 0.010495 |
| GO:0045580~regulation of T cell differentiation                                                                                                             | 12  | 0.010845 |
| GO:0010740~positive regulation of protein kinase cascade                                                                                                    | 18  | 0.010961 |
| GO:0009199~ribonucleoside triphosphate metabolic process                                                                                                    | 20  | 0.010971 |
| GO:0034220~ion transmembrane transport                                                                                                                      | 11  | 0.011303 |
| GO:0002260~lymphocyte homeostasis                                                                                                                           | 9   | 0.01134  |
| GO:0031341~regulation of cell killing                                                                                                                       | 9   | 0.01134  |
| GO:0001910~regulation of leukocyte mediated cytotoxicity                                                                                                    | 9   | 0.01134  |
| GO:0051100~negative regulation of binding                                                                                                                   | 9   | 0.01134  |
| GO:0050851~antigen receptor-mediated signaling pathway                                                                                                      | 10  | 0.01152  |

|                                                                                 |     |          |
|---------------------------------------------------------------------------------|-----|----------|
| GO:0006672~ceramide metabolic process                                           | 10  | 0.01152  |
| GO:0045860~positive regulation of protein kinase activity                       | 23  | 0.011545 |
| GO:0055066~di-, tri-valent inorganic cation homeostasis                         | 26  | 0.01159  |
| GO:0048535~lymph node development                                               | 7   | 0.011697 |
| GO:0031497~chromatin assembly                                                   | 16  | 0.01193  |
| GO:0007159~leukocyte adhesion                                                   | 6   | 0.012094 |
| GO:0006825~copper ion transport                                                 | 6   | 0.012094 |
| GO:0042107~cytokine metabolic process                                           | 6   | 0.012094 |
| GO:0051050~positive regulation of transport                                     | 24  | 0.01231  |
| GO:0006665~sphingolipid metabolic process                                       | 14  | 0.012611 |
| GO:0045944~positive regulation of transcription from RNA polymerase II promoter | 53  | 0.013106 |
| GO:0009260~ribonucleotide biosynthetic process                                  | 21  | 0.013206 |
| GO:0007585~respiratory gaseous exchange                                         | 8   | 0.013312 |
| GO:0009615~response to virus                                                    | 16  | 0.013439 |
| GO:0065004~protein-DNA complex assembly                                         | 16  | 0.013439 |
| GO:0034728~nucleosome organization                                              | 16  | 0.013439 |
| GO:0007015~actin filament organization                                          | 13  | 0.013677 |
| GO:0016049~cell growth                                                          | 10  | 0.013817 |
| GO:0015986~ATP synthesis coupled proton transport                               | 10  | 0.013817 |
| GO:0015985~energy coupled proton transport, down electrochemical gradient       | 10  | 0.013817 |
| GO:0002366~leukocyte activation during immune response                          | 9   | 0.013888 |
| GO:0007595~lactation                                                            | 9   | 0.013888 |
| GO:0002263~cell activation during immune response                               | 9   | 0.013888 |
| GO:0009150~purine ribonucleotide metabolic process                              | 22  | 0.014184 |
| GO:0006357~regulation of transcription from RNA polymerase II promoter          | 84  | 0.014555 |
| GO:0003018~vascular process in circulatory system                               | 12  | 0.014721 |
| GO:0002698~negative regulation of immune effector process                       | 7   | 0.015231 |
| GO:0050727~regulation of inflammatory response                                  | 13  | 0.01569  |
| GO:0048872~homeostasis of number of cells                                       | 21  | 0.015921 |
| GO:0043368~positive T cell selection                                            | 5   | 0.01603  |
| GO:0009144~purine nucleoside triphosphate metabolic process                     | 20  | 0.016279 |
| GO:0006643~membrane lipid metabolic process                                     | 14  | 0.016336 |
| GO:0046519~sphingoid metabolic process                                          | 10  | 0.016436 |
| GO:0032760~positive regulation of tumor necrosis factor production              | 6   | 0.016574 |
| GO:0045840~positive regulation of mitosis                                       | 6   | 0.016574 |
| GO:0006911~phagocytosis, engulfment                                             | 6   | 0.016574 |
| GO:0051785~positive regulation of nuclear division                              | 6   | 0.016574 |
| GO:0070201~regulation of establishment of protein localization                  | 15  | 0.016721 |
| GO:0045582~positive regulation of T cell differentiation                        | 9   | 0.016829 |
| GO:0052547~regulation of peptidase activity                                     | 12  | 0.017012 |
| GO:0051056~regulation of small GTPase mediated signal transduction              | 36  | 0.017492 |
| GO:0048732~gland development                                                    | 32  | 0.017608 |
| GO:0010033~response to organic substance                                        | 70  | 0.018116 |
| GO:0046328~regulation of JNK cascade                                            | 11  | 0.018283 |
| GO:0032886~regulation of microtubule-based process                              | 11  | 0.018283 |
| GO:0051223~regulation of protein transport                                      | 14  | 0.018486 |
| GO:0002467~germinal center formation                                            | 4   | 0.018961 |
| GO:0009141~nucleoside triphosphate metabolic process                            | 21  | 0.019056 |
| GO:0051252~regulation of RNA metabolic process                                  | 184 | 0.019116 |
| GO:0001776~leukocyte homeostasis                                                | 10  | 0.019401 |
| GO:0060322~head development                                                     | 7   | 0.019441 |
| GO:0030100~regulation of endocytosis                                            | 12  | 0.019557 |
| GO:0051235~maintenance of location                                              | 9   | 0.020193 |
| GO:0043406~positive regulation of MAP kinase activity                           | 13  | 0.020378 |
| GO:0070302~regulation of stress-activated protein kinase signaling pathway      | 11  | 0.021194 |

|                                                                                                                                                             |    |          |
|-------------------------------------------------------------------------------------------------------------------------------------------------------------|----|----------|
| GO:0033043~regulation of organelle organization                                                                                                             | 26 | 0.021708 |
| GO:0008354~germ cell migration                                                                                                                              | 5  | 0.023096 |
| GO:0046823~negative regulation of nucleocytoplasmic transport                                                                                               | 5  | 0.023096 |
| GO:0009259~ribonucleotide metabolic process                                                                                                                 | 22 | 0.02373  |
| GO:0007033~vacuole organization                                                                                                                             | 9  | 0.024008 |
| GO:0050885~neuromuscular process controlling balance                                                                                                        | 9  | 0.024008 |
| GO:0002824~positive regulation of adaptive immune response based on somatic recombination of immune receptors built from immunoglobulin superfamily domains | 9  | 0.024008 |
| GO:0045787~positive regulation of cell cycle                                                                                                                | 9  | 0.024008 |
| GO:0002821~positive regulation of adaptive immune response                                                                                                  | 9  | 0.024008 |
| GO:0002573~myeloid leukocyte differentiation                                                                                                                | 9  | 0.024008 |
| GO:0032101~regulation of response to external stimulus                                                                                                      | 19 | 0.024124 |
| GO:0043433~negative regulation of transcription factor activity                                                                                             | 7  | 0.024379 |
| GO:0001974~blood vessel remodeling                                                                                                                          | 7  | 0.024379 |
| GO:0048771~tissue remodeling                                                                                                                                | 11 | 0.024429 |
| GO:0019362~pyridine nucleotide metabolic process                                                                                                            | 8  | 0.024728 |
| GO:0045185~maintenance of protein location                                                                                                                  | 8  | 0.024728 |
| GO:0080135~regulation of cellular response to stress                                                                                                        | 15 | 0.026124 |
| GO:0006869~lipid transport                                                                                                                                  | 21 | 0.02674  |
| GO:0051336~regulation of hydrolase activity                                                                                                                 | 31 | 0.027234 |
| GO:0009725~response to hormone stimulus                                                                                                                     | 27 | 0.027474 |
| GO:0032880~regulation of protein localization                                                                                                               | 17 | 0.027894 |
| GO:0035150~regulation of tube size                                                                                                                          | 11 | 0.028003 |
| GO:0050880~regulation of blood vessel size                                                                                                                  | 11 | 0.028003 |
| GO:0042102~positive regulation of T cell proliferation                                                                                                      | 9  | 0.028301 |
| GO:0046578~regulation of Ras protein signal transduction                                                                                                    | 29 | 0.028353 |
| GO:0060627~regulation of vesicle-mediated transport                                                                                                         | 16 | 0.028515 |
| GO:0016051~carbohydrate biosynthetic process                                                                                                                | 16 | 0.028515 |
| GO:0060324~face development                                                                                                                                 | 6  | 0.028535 |
| GO:0045766~positive regulation of angiogenesis                                                                                                              | 6  | 0.028535 |
| GO:0032729~positive regulation of interferon-gamma production                                                                                               | 6  | 0.028535 |
| GO:0043933~macromolecular complex subunit organization                                                                                                      | 52 | 0.02951  |
| GO:0043085~positive regulation of catalytic activity                                                                                                        | 39 | 0.029513 |
| GO:0048536~spleen development                                                                                                                               | 7  | 0.030088 |
| GO:0031343~positive regulation of cell killing                                                                                                              | 7  | 0.030088 |
| GO:0001912~positive regulation of leukocyte mediated cytotoxicity                                                                                           | 7  | 0.030088 |
| GO:0001933~negative regulation of protein amino acid phosphorylation                                                                                        | 7  | 0.030088 |
| GO:0002224~toll-like receptor signaling pathway                                                                                                             | 4  | 0.030576 |
| GO:0045084~positive regulation of interleukin-12 biosynthetic process                                                                                       | 4  | 0.030576 |
| GO:0010812~negative regulation of cell-substrate adhesion                                                                                                   | 4  | 0.030576 |
| GO:0002718~regulation of cytokine production during immune response                                                                                         | 4  | 0.030576 |
| GO:0002456~T cell mediated immunity                                                                                                                         | 4  | 0.030576 |
| GO:0050798~activated T cell proliferation                                                                                                                   | 4  | 0.030576 |
| GO:0051452~intracellular pH reduction                                                                                                                       | 4  | 0.030576 |
| GO:0050868~negative regulation of T cell activation                                                                                                         | 10 | 0.030588 |
| GO:0032763~regulation of mast cell cytokine production                                                                                                      | 3  | 0.031757 |
| GO:0046633~alpha-beta T cell proliferation                                                                                                                  | 3  | 0.031757 |
| GO:0002238~response to molecule of fungal origin                                                                                                            | 3  | 0.031757 |
| GO:0006021~inositol biosynthetic process                                                                                                                    | 3  | 0.031757 |
| GO:0031113~regulation of microtubule polymerization                                                                                                         | 5  | 0.031775 |
| GO:0002920~regulation of humoral immune response                                                                                                            | 5  | 0.031775 |
| GO:0032387~negative regulation of intracellular transport                                                                                                   | 5  | 0.031775 |
| GO:0010829~negative regulation of glucose transport                                                                                                         | 5  | 0.031775 |
| GO:0046486~glycerolipid metabolic process                                                                                                                   | 22 | 0.032419 |
| GO:0034637~cellular carbohydrate biosynthetic process                                                                                                       | 12 | 0.032595 |
| GO:0006119~oxidative phosphorylation                                                                                                                        | 12 | 0.032595 |

|                                                                |    |          |
|----------------------------------------------------------------|----|----------|
| GO:0070507~regulation of microtubule cytoskeleton organization | 9  | 0.033095 |
| GO:0051969~regulation of transmission of nerve impulse         | 19 | 0.034028 |
| GO:0055080~cation homeostasis                                  | 29 | 0.03423  |
| GO:0001570~vasculogenesis                                      | 10 | 0.03515  |
| GO:0065003~macromolecular complex assembly                     | 48 | 0.035248 |
| GO:0033157~regulation of intracellular protein transport       | 8  | 0.035265 |
| GO:0060341~regulation of cellular localization                 | 26 | 0.035293 |
| GO:0007167~enzyme linked receptor protein signaling pathway    | 40 | 0.036024 |
| GO:0043281~regulation of caspase activity                      | 11 | 0.036238 |
| GO:0052548~regulation of endopeptidase activity                | 11 | 0.036238 |
| GO:0001818~negative regulation of cytokine production          | 7  | 0.036605 |
| GO:0050729~positive regulation of inflammatory response        | 7  | 0.036605 |
| GO:0009820~alkaloid metabolic process                          | 7  | 0.036605 |
| GO:0031646~positive regulation of neurological system process  | 7  | 0.036605 |
| GO:0046496~nicotinamide nucleotide metabolic process           | 7  | 0.036605 |
| GO:0006769~nicotinamide metabolic process                      | 7  | 0.036605 |
| GO:0032271~regulation of protein polymerization                | 12 | 0.036637 |
| GO:0018212~peptidyl-tyrosine modification                      | 9  | 0.038413 |
| GO:0046165~alcohol biosynthetic process                        | 9  | 0.038413 |
| GO:0018108~peptidyl-tyrosine phosphorylation                   | 9  | 0.038413 |
| GO:0006333~chromatin assembly or disassembly                   | 19 | 0.039977 |
| GO:0045637~regulation of myeloid cell differentiation          | 11 | 0.040928 |
| GO:0007163~establishment or maintenance of cell polarity       | 8  | 0.041501 |
| GO:0006910~phagocytosis, recognition                           | 5  | 0.042114 |
| GO:0045408~regulation of interleukin-6 biosynthetic process    | 5  | 0.042114 |
| GO:0055074~calcium ion homeostasis                             | 17 | 0.043456 |
| GO:0010741~negative regulation of protein kinase cascade       | 7  | 0.043961 |
| GO:0002637~regulation of immunoglobulin production             | 7  | 0.043961 |
| GO:0051651~maintenance of location in cell                     | 7  | 0.043961 |
| GO:0051224~negative regulation of protein transport            | 6  | 0.04486  |
| GO:0033032~regulation of myeloid cell apoptosis                | 4  | 0.045103 |
| GO:0045579~positive regulation of B cell differentiation       | 4  | 0.045103 |
| GO:0001810~regulation of type I hypersensitivity               | 4  | 0.045103 |
| GO:0042308~negative regulation of protein import into nucleus  | 4  | 0.045103 |
| GO:0015992~proton transport                                    | 11 | 0.046016 |
| GO:0051276~chromosome organization                             | 55 | 0.048184 |
| GO:0009165~nucleotide biosynthetic process                     | 27 | 0.048542 |



**Supplementary Table 4. Correlation coefficients and p-values between co-expression modules and oligomeric procyanidins treatment.**

| <b>Module</b> | <b>R</b> | <b>P-value</b> |
|---------------|----------|----------------|
| OPC_M1        | 0.15     | 0.77           |
| OPC_M2        | 0.41     | 0.42           |
| OPC_M3        | 0.36     | 0.48           |
| OPC_M4        | 0.23     | 0.66           |
| OPC_M5        | -0.37    | 0.47           |
| OPC_M6        | -0.35    | 0.49           |
| OPC_M7        | 0.79     | 0.06           |
| OPC_M8        | 0.15     | 0.78           |
| OPC_M9        | 0.15     | 0.78           |
| OPC_M10       | -0.45    | 0.38           |
| OPC_M11       | -0.02    | 0.98           |
| OPC_M12       | 0.12     | 0.82           |
| OPC_M13       | 0.06     | 0.91           |
| OPC_M14       | 0.63     | 0.18           |
| OPC_M15       | -0.25    | 0.64           |
| OPC_M16       | -0.65    | 0.16           |
| OPC_M17       | -0.66    | 0.15           |
| OPC_M18       | -0.94    | 0.006          |
| OPC_M19       | -0.46    | 0.36           |
| OPC_M20       | 0.49     | 0.32           |
| OPC_M21       | -0.43    | 0.39           |
| OPC_M22       | -0.08    | 0.87           |
| OPC_M23       | -0.21    | 0.70           |
| OPC_M24       | 0.54     | 0.27           |
| OPC_M25       | 0.97     | 0.001          |

**Supplementary Table 5. Biological processes enriched in the genes in the OPC\_M18 module**

| <b>Term</b>                                                                                                   | <b>Count</b> | <b>PValue</b> |
|---------------------------------------------------------------------------------------------------------------|--------------|---------------|
| GO:0008219~cell death                                                                                         | 107          | 5.05E-06      |
| GO:0016265~death                                                                                              | 107          | 6.92E-06      |
| GO:0006468~protein amino acid phosphorylation                                                                 | 100          | 7.79E-06      |
| GO:0009725~response to hormone stimulus                                                                       | 63           | 8.21E-06      |
| GO:0045859~regulation of protein kinase activity                                                              | 60           | 9.23E-06      |
| GO:0051338~regulation of transferase activity                                                                 | 63           | 1.27E-05      |
| GO:0043549~regulation of kinase activity                                                                      | 61           | 1.35E-05      |
| GO:0019220~regulation of phosphate metabolic process                                                          | 77           | 1.37E-05      |
| GO:0051174~regulation of phosphorus metabolic process                                                         | 77           | 1.37E-05      |
| GO:0010033~response to organic substance                                                                      | 105          | 1.64E-05      |
| GO:0006793~phosphorus metabolic process                                                                       | 134          | 1.67E-05      |
| GO:0006796~phosphate metabolic process                                                                        | 134          | 1.67E-05      |
| GO:0012501~programmed cell death                                                                              | 91           | 2.73E-05      |
| GO:0007242~intracellular signaling cascade                                                                    | 164          | 3.35E-05      |
| GO:0042325~regulation of phosphorylation                                                                      | 73           | 3.71E-05      |
| GO:0043627~response to estrogen stimulus                                                                      | 25           | 4.83E-05      |
| GO:0009719~response to endogenous stimulus                                                                    | 65           | 5.03E-05      |
| GO:0006915~apoptosis                                                                                          | 88           | 7.46E-05      |
| GO:0006396~RNA processing                                                                                     | 80           | 1.61E-04      |
| GO:0048545~response to steroid hormone stimulus                                                               | 36           | 1.67E-04      |
| GO:0051270~regulation of cell motion                                                                          | 36           | 1.85E-04      |
| GO:0044093~positive regulation of molecular function                                                          | 84           | 2.17E-04      |
| GO:0042254~ribosome biogenesis                                                                                | 26           | 2.20E-04      |
| GO:0031327~negative regulation of cellular biosynthetic process                                               | 81           | 2.24E-04      |
| GO:0022613~ribonucleoprotein complex biogenesis                                                               | 34           | 2.27E-04      |
| GO:0030334~regulation of cell migration                                                                       | 32           | 3.43E-04      |
| GO:0045860~positive regulation of protein kinase activity                                                     | 39           | 3.72E-04      |
| GO:0010629~negative regulation of gene expression                                                             | 73           | 4.30E-04      |
| GO:0010558~negative regulation of macromolecule biosynthetic process                                          | 78           | 4.31E-04      |
| GO:0009890~negative regulation of biosynthetic process                                                        | 81           | 4.37E-04      |
| GO:0010604~positive regulation of macromolecule metabolic process                                             | 113          | 4.74E-04      |
| GO:0010605~negative regulation of macromolecule metabolic process                                             | 99           | 5.10E-04      |
| GO:0016310~phosphorylation                                                                                    | 106          | 6.04E-04      |
| GO:0031399~regulation of protein modification process                                                         | 47           | 7.40E-04      |
| GO:0033674~positive regulation of kinase activity                                                             | 39           | 7.50E-04      |
| GO:0008630~DNA damage response, signal transduction resulting in induction of apoptosis                       | 11           | 7.90E-04      |
| GO:0051272~positive regulation of cell motion                                                                 | 21           | 9.54E-04      |
| GO:0006261~DNA-dependent DNA replication                                                                      | 15           | 9.92E-04      |
| GO:0016481~negative regulation of transcription                                                               | 66           | 0.001014      |
| GO:0043067~regulation of programmed cell death                                                                | 106          | 0.00103       |
| GO:0043085~positive regulation of catalytic activity                                                          | 73           | 0.001046      |
| GO:0010941~regulation of cell death                                                                           | 106          | 0.001155      |
| GO:0007049~cell cycle                                                                                         | 101          | 0.001501      |
| GO:0040012~regulation of locomotion                                                                           | 33           | 0.001517      |
| GO:0042981~regulation of apoptosis                                                                            | 104          | 0.001526      |
| GO:0051347~positive regulation of transferase activity                                                        | 39           | 0.001549      |
| GO:0051172~negative regulation of nitrogen compound metabolic process                                         | 72           | 0.001584      |
| GO:0045934~negative regulation of nucleobase, nucleoside, nucleotide and nucleic acid metabolic process       | 71           | 0.001701      |
| GO:0042771~DNA damage response, signal transduction by p53 class mediator resulting in induction of apoptosis | 7            | 0.001861      |
| GO:0030335~positive regulation of cell migration                                                              | 19           | 0.001868      |
| GO:0030330~DNA damage response, signal transduction by p53 class mediator                                     | 9            | 0.002361      |
| GO:0040017~positive regulation of locomotion                                                                  | 20           | 0.002367      |
| GO:0051491~positive regulation of filopodium assembly                                                         | 5            | 0.002383      |
| GO:0051489~regulation of filopodium assembly                                                                  | 5            | 0.002383      |

|                                                                                     |     |          |
|-------------------------------------------------------------------------------------|-----|----------|
| GO:0006350~transcription                                                            | 240 | 0.002388 |
| GO:0009891~positive regulation of biosynthetic process                              | 90  | 0.003203 |
| GO:0022604~regulation of cell morphogenesis                                         | 24  | 0.003389 |
| GO:0008285~negative regulation of cell proliferation                                | 52  | 0.003537 |
| GO:0007243~protein kinase cascade                                                   | 53  | 0.003614 |
| GO:0042770~DNA damage response, signal transduction                                 | 17  | 0.003666 |
| GO:0034470~ncRNA processing                                                         | 31  | 0.003767 |
| GO:0007178~transmembrane receptor protein serine/threonine kinase signaling pathway | 20  | 0.004228 |
| GO:0045892~negative regulation of transcription, DNA-dependent                      | 51  | 0.004338 |
| GO:0031328~positive regulation of cellular biosynthetic process                     | 88  | 0.004562 |
| GO:0000079~regulation of cyclin-dependent protein kinase activity                   | 13  | 0.004641 |
| GO:0042060~wound healing                                                            | 31  | 0.005153 |
| GO:0060491~regulation of cell projection assembly                                   | 7   | 0.00536  |
| GO:0048701~embryonic cranial skeleton morphogenesis                                 | 7   | 0.00536  |
| GO:0033993~response to lipid                                                        | 7   | 0.00536  |
| GO:0032268~regulation of cellular protein metabolic process                         | 64  | 0.005412 |
| GO:0043065~positive regulation of apoptosis                                         | 59  | 0.005449 |
| GO:0032270~positive regulation of cellular protein metabolic process                | 36  | 0.005528 |
| GO:0051253~negative regulation of RNA metabolic process                             | 51  | 0.006008 |
| GO:0045449~regulation of transcription                                              | 287 | 0.006014 |
| GO:0035023~regulation of Rho protein signal transduction                            | 19  | 0.006165 |
| GO:0051247~positive regulation of protein metabolic process                         | 37  | 0.00618  |
| GO:0043068~positive regulation of programmed cell death                             | 59  | 0.006408 |
| GO:0006364~rRNA processing                                                          | 18  | 0.006482 |
| GO:0010942~positive regulation of cell death                                        | 59  | 0.006932 |
| GO:0008286~insulin receptor signaling pathway                                       | 10  | 0.007312 |
| GO:0010557~positive regulation of macromolecule biosynthetic process                | 83  | 0.007732 |
| GO:0006357~regulation of transcription from RNA polymerase II promoter              | 91  | 0.007822 |
| GO:0043069~negative regulation of programmed cell death                             | 50  | 0.008095 |
| GO:0001817~regulation of cytokine production                                        | 29  | 0.008262 |
| GO:0055088~lipid homeostasis                                                        | 12  | 0.00832  |
| GO:0007167~enzyme linked receptor protein signaling pathway                         | 48  | 0.008347 |
| GO:0001932~regulation of protein amino acid phosphorylation                         | 28  | 0.008357 |
| GO:0070482~response to oxygen levels                                                | 24  | 0.008473 |
| GO:0043405~regulation of MAP kinase activity                                        | 24  | 0.008473 |
| GO:0060548~negative regulation of cell death                                        | 50  | 0.008507 |
| GO:0042127~regulation of cell proliferation                                         | 97  | 0.009018 |
| GO:0001666~response to hypoxia                                                      | 23  | 0.009174 |
| GO:0044087~regulation of cellular component biogenesis                              | 24  | 0.009215 |
| GO:0015031~protein transport                                                        | 94  | 0.00973  |
| GO:0016072~rRNA metabolic process                                                   | 18  | 0.009941 |
| GO:0006917~induction of apoptosis                                                   | 45  | 0.01028  |
| GO:0048534~hemopoietic or lymphoid organ development                                | 38  | 0.010512 |
| GO:0006974~response to DNA damage stimulus                                          | 51  | 0.010514 |
| GO:0006730~one-carbon metabolic process                                             | 20  | 0.010547 |
| GO:0012502~induction of programmed cell death                                       | 45  | 0.010842 |
| GO:0007264~small GTPase mediated signal transduction                                | 43  | 0.011676 |
| GO:0070201~regulation of establishment of protein localization                      | 21  | 0.011715 |
| GO:0043255~regulation of carbohydrate biosynthetic process                          | 7   | 0.01219  |
| GO:0045184~establishment of protein localization                                    | 94  | 0.012321 |
| GO:0016311~dephosphorylation                                                        | 25  | 0.012609 |
| GO:0033554~cellular response to stress                                              | 72  | 0.012681 |
| GO:0031346~positive regulation of cell projection organization                      | 11  | 0.012777 |
| GO:0007005~mitochondrion organization                                               | 23  | 0.012802 |
| GO:0032880~regulation of protein localization                                       | 23  | 0.012802 |
| GO:0008629~induction of apoptosis by intracellular signals                          | 12  | 0.012815 |
| GO:0034660~ncRNA metabolic process                                                  | 34  | 0.013434 |
| GO:0051789~response to protein stimulus                                             | 19  | 0.01367  |

|                                                                                                         |     |          |
|---------------------------------------------------------------------------------------------------------|-----|----------|
| GO:0048703~embryonic viscerocranium morphogenesis                                                       | 4   | 0.014357 |
| GO:0010887~negative regulation of cholesterol storage                                                   | 4   | 0.014357 |
| GO:0043066~negative regulation of apoptosis                                                             | 48  | 0.015118 |
| GO:0007507~heart development                                                                            | 32  | 0.015177 |
| GO:0002520~immune system development                                                                    | 39  | 0.015919 |
| GO:0007010~cytoskeleton organization                                                                    | 57  | 0.016123 |
| GO:0051271~negative regulation of cell motion                                                           | 13  | 0.016151 |
| GO:0006984~ER-nuclear signaling pathway                                                                 | 9   | 0.016328 |
| GO:0019637~organophosphate metabolic process                                                            | 30  | 0.017137 |
| GO:0051301~cell division                                                                                | 41  | 0.017256 |
| GO:0043406~positive regulation of MAP kinase activity                                                   | 18  | 0.017716 |
| GO:0043009~chordate embryonic development                                                               | 45  | 0.017751 |
| GO:0000165~MAPKKK cascade                                                                               | 28  | 0.018124 |
| GO:0002474~antigen processing and presentation of peptide antigen via MHC class I                       | 6   | 0.019187 |
| GO:0045935~positive regulation of nucleobase, nucleoside, nucleotide and nucleic acid metabolic process | 77  | 0.019429 |
| GO:0014706~striated muscle tissue development                                                           | 20  | 0.019435 |
| GO:0051173~positive regulation of nitrogen compound metabolic process                                   | 79  | 0.020331 |
| GO:0009792~embryonic development ending in birth or egg hatching                                        | 45  | 0.020606 |
| GO:0006259~DNA metabolic process                                                                        | 64  | 0.020812 |
| GO:0060627~regulation of vesicle-mediated transport                                                     | 17  | 0.020987 |
| GO:0031401~positive regulation of protein modification process                                          | 28  | 0.021955 |
| GO:0030509~BMP signaling pathway                                                                        | 10  | 0.022663 |
| GO:0031344~regulation of cell projection organization                                                   | 16  | 0.022699 |
| GO:0010888~negative regulation of lipid storage                                                         | 5   | 0.022739 |
| GO:0006264~mitochondrial DNA replication                                                                | 4   | 0.023338 |
| GO:0032365~intracellular lipid transport                                                                | 4   | 0.023338 |
| GO:0090003~regulation of establishment of protein localization to plasma membrane                       | 4   | 0.023338 |
| GO:0008380~RNA splicing                                                                                 | 39  | 0.024033 |
| GO:0051291~protein heterooligomerization                                                                | 11  | 0.025195 |
| GO:0006605~protein targeting                                                                            | 31  | 0.025197 |
| GO:0051130~positive regulation of cellular component organization                                       | 27  | 0.025649 |
| GO:0033630~positive regulation of cell adhesion mediated by integrin                                    | 3   | 0.026145 |
| GO:0060317~cardiac epithelial to mesenchymal transition                                                 | 3   | 0.026145 |
| GO:0006644~phospholipid metabolic process                                                               | 28  | 0.026391 |
| GO:0006260~DNA replication                                                                              | 28  | 0.026391 |
| GO:0007179~transforming growth factor beta receptor signaling pathway                                   | 12  | 0.027023 |
| GO:0032869~cellular response to insulin stimulus                                                        | 13  | 0.028287 |
| GO:0045669~positive regulation of osteoblast differentiation                                            | 7   | 0.028551 |
| GO:0030036~actin cytoskeleton organization                                                              | 32  | 0.028654 |
| GO:0032259~methylation                                                                                  | 14  | 0.029105 |
| GO:0008104~protein localization                                                                         | 103 | 0.029173 |
| GO:0065003~macromolecular complex assembly                                                              | 80  | 0.029583 |
| GO:0045937~positive regulation of phosphate metabolic process                                           | 17  | 0.029718 |
| GO:0010562~positive regulation of phosphorus metabolic process                                          | 17  | 0.029718 |
| GO:0030100~regulation of endocytosis                                                                    | 12  | 0.030196 |
| GO:0032870~cellular response to hormone stimulus                                                        | 21  | 0.030268 |
| GO:0006470~protein amino acid dephosphorylation                                                         | 21  | 0.030268 |
| GO:0017015~regulation of transforming growth factor beta receptor signaling pathway                     | 9   | 0.030313 |
| GO:0030097~hemopoiesis                                                                                  | 33  | 0.030632 |
| GO:0060537~muscle tissue development                                                                    | 20  | 0.03091  |
| GO:0043414~biopolymer methylation                                                                       | 13  | 0.031345 |
| GO:0051254~positive regulation of RNA metabolic process                                                 | 60  | 0.031955 |
| GO:0008360~regulation of cell shape                                                                     | 11  | 0.032018 |
| GO:0042476~odontogenesis                                                                                | 11  | 0.032018 |
| GO:0030099~myeloid cell differentiation                                                                 | 16  | 0.03243  |
| GO:0035295~tube development                                                                             | 31  | 0.033169 |
| GO:0030857~negative regulation of epithelial cell differentiation                                       | 4   | 0.034699 |
| GO:0046321~positive regulation of fatty acid oxidation                                                  | 4   | 0.034699 |

|                                                                                   |     |          |
|-----------------------------------------------------------------------------------|-----|----------|
| GO:0032042~mitochondrial DNA metabolic process                                    | 4   | 0.034699 |
| GO:0046785~microtubule polymerization                                             | 4   | 0.034699 |
| GO:0030278~regulation of ossification                                             | 14  | 0.035179 |
| GO:0006195~purine nucleotide catabolic process                                    | 8   | 0.035189 |
| GO:0051592~response to calcium ion                                                | 11  | 0.035875 |
| GO:0032570~response to progesterone stimulus                                      | 6   | 0.037757 |
| GO:0010627~regulation of protein kinase cascade                                   | 34  | 0.037804 |
| GO:0006986~response to unfolded protein                                           | 13  | 0.038161 |
| GO:0045893~positive regulation of transcription, DNA-dependent                    | 59  | 0.03848  |
| GO:0006869~lipid transport                                                        | 22  | 0.03862  |
| GO:0006461~protein complex assembly                                               | 62  | 0.03864  |
| GO:0070271~protein complex biogenesis                                             | 62  | 0.03864  |
| GO:0005979~regulation of glycogen biosynthetic process                            | 5   | 0.039376 |
| GO:0010962~regulation of glucan biosynthetic process                              | 5   | 0.039376 |
| GO:0032885~regulation of polysaccharide biosynthetic process                      | 5   | 0.039376 |
| GO:0008624~induction of apoptosis by extracellular signals                        | 18  | 0.040106 |
| GO:0010628~positive regulation of gene expression                                 | 70  | 0.040749 |
| GO:0034976~response to endoplasmic reticulum stress                               | 8   | 0.040753 |
| GO:0051252~regulation of RNA metabolic process                                    | 197 | 0.041535 |
| GO:0051094~positive regulation of developmental process                           | 37  | 0.041934 |
| GO:0042157~lipoprotein metabolic process                                          | 14  | 0.04211  |
| GO:0045596~negative regulation of cell differentiation                            | 30  | 0.042567 |
| GO:0051056~regulation of small GTPase mediated signal transduction                | 34  | 0.043629 |
| GO:0030336~negative regulation of cell migration                                  | 11  | 0.044531 |
| GO:0042327~positive regulation of phosphorylation                                 | 16  | 0.044902 |
| GO:0034620~cellular response to unfolded protein                                  | 6   | 0.045746 |
| GO:0030968~endoplasmic reticulum unfolded protein response                        | 6   | 0.045746 |
| GO:0008283~cell proliferation                                                     | 54  | 0.046341 |
| GO:0017038~protein import                                                         | 20  | 0.046812 |
| GO:0051259~protein oligomerization                                                | 25  | 0.046869 |
| GO:0032319~regulation of Rho GTPase activity                                      | 7   | 0.047465 |
| GO:0010876~lipid localization                                                     | 23  | 0.047768 |
| GO:0044272~sulfur compound biosynthetic process                                   | 10  | 0.04778  |
| GO:0010746~regulation of plasma membrane long-chain fatty acid transport          | 3   | 0.048958 |
| GO:0010891~negative regulation of sequestering of triglyceride                    | 3   | 0.048958 |
| GO:0032367~intracellular cholesterol transport                                    | 3   | 0.048958 |
| GO:0032366~intracellular sterol transport                                         | 3   | 0.048958 |
| GO:0010748~negative regulation of plasma membrane long-chain fatty acid transport | 3   | 0.048958 |
| GO:0007032~endosome organization                                                  | 5   | 0.049712 |
| GO:0032881~regulation of polysaccharide metabolic process                         | 5   | 0.049712 |

---

**Supplementary Table 6. Biological processes enriched in the genes in the OPC\_M25 module**

| Term                                                                                                    | Count | PValue   |
|---------------------------------------------------------------------------------------------------------|-------|----------|
| GO:0009615~response to virus                                                                            | 36    | 1.91E-11 |
| GO:0042127~regulation of cell proliferation                                                             | 124   | 2.30E-09 |
| GO:0042981~regulation of apoptosis                                                                      | 124   | 8.77E-09 |
| GO:0010941~regulation of cell death                                                                     | 125   | 1.02E-08 |
| GO:0043067~regulation of programmed cell death                                                          | 124   | 1.50E-08 |
| GO:0010033~response to organic substance                                                                | 113   | 1.78E-08 |
| GO:0008285~negative regulation of cell proliferation                                                    | 64    | 5.08E-07 |
| GO:0030335~positive regulation of cell migration                                                        | 25    | 1.06E-06 |
| GO:0016477~cell migration                                                                               | 52    | 1.10E-06 |
| GO:0009891~positive regulation of biosynthetic process                                                  | 103   | 1.29E-06 |
| GO:0010942~positive regulation of cell death                                                            | 72    | 1.31E-06 |
| GO:0030334~regulation of cell migration                                                                 | 37    | 1.44E-06 |
| GO:0043065~positive regulation of apoptosis                                                             | 71    | 1.71E-06 |
| GO:0040017~positive regulation of locomotion                                                            | 26    | 1.95E-06 |
| GO:0031328~positive regulation of cellular biosynthetic process                                         | 101   | 2.04E-06 |
| GO:0043068~positive regulation of programmed cell death                                                 | 71    | 2.22E-06 |
| GO:0040012~regulation of locomotion                                                                     | 39    | 4.83E-06 |
| GO:0051270~regulation of cell motion                                                                    | 39    | 5.49E-06 |
| GO:0007242~intracellular signaling cascade                                                              | 162   | 6.19E-06 |
| GO:0034097~response to cytokine stimulus                                                                | 22    | 6.33E-06 |
| GO:0051272~positive regulation of cell motion                                                           | 25    | 6.71E-06 |
| GO:0010557~positive regulation of macromolecule biosynthetic process                                    | 95    | 8.19E-06 |
| GO:0048660~regulation of smooth muscle cell proliferation                                               | 16    | 9.06E-06 |
| GO:0048661~positive regulation of smooth muscle cell proliferation                                      | 13    | 9.72E-06 |
| GO:0010604~positive regulation of macromolecule metabolic process                                       | 117   | 1.27E-05 |
| GO:0051173~positive regulation of nitrogen compound metabolic process                                   | 92    | 2.25E-05 |
| GO:0051674~localization of cell                                                                         | 52    | 2.49E-05 |
| GO:0048870~cell motility                                                                                | 52    | 2.49E-05 |
| GO:0001525~angiogenesis                                                                                 | 31    | 2.91E-05 |
| GO:0001666~response to hypoxia                                                                          | 29    | 2.99E-05 |
| GO:0009725~response to hormone stimulus                                                                 | 59    | 3.22E-05 |
| GO:0010324~membrane invagination                                                                        | 40    | 5.17E-05 |
| GO:0006897~endocytosis                                                                                  | 40    | 5.17E-05 |
| GO:0046697~decidualization                                                                              | 8     | 5.86E-05 |
| GO:0010628~positive regulation of gene expression                                                       | 83    | 5.94E-05 |
| GO:0007167~enzyme linked receptor protein signaling pathway                                             | 55    | 6.05E-05 |
| GO:0009611~response to wounding                                                                         | 77    | 6.55E-05 |
| GO:0033273~response to vitamin                                                                          | 18    | 7.32E-05 |
| GO:0070482~response to oxygen levels                                                                    | 29    | 7.77E-05 |
| GO:0002237~response to molecule of bacterial origin                                                     | 21    | 8.46E-05 |
| GO:0009719~response to endogenous stimulus                                                              | 62    | 8.56E-05 |
| GO:0045935~positive regulation of nucleobase, nucleoside, nucleotide and nucleic acid metabolic process | 87    | 9.19E-05 |
| GO:0006928~cell motion                                                                                  | 70    | 9.48E-05 |
| GO:0051789~response to protein stimulus                                                                 | 24    | 9.49E-05 |
| GO:0045941~positive regulation of transcription                                                         | 80    | 1.05E-04 |
| GO:0045893~positive regulation of transcription, DNA-dependent                                          | 70    | 1.09E-04 |
| GO:0006955~immune response                                                                              | 94    | 1.12E-04 |
| GO:0042330~taxis                                                                                        | 31    | 1.31E-04 |
| GO:0006935~chemotaxis                                                                                   | 31    | 1.31E-04 |
| GO:0051254~positive regulation of RNA metabolic process                                                 | 70    | 1.40E-04 |
| GO:0048545~response to steroid hormone stimulus                                                         | 35    | 1.56E-04 |
| GO:0016265~death                                                                                        | 97    | 1.59E-04 |
| GO:0008284~positive regulation of cell proliferation                                                    | 62    | 1.60E-04 |
| GO:0001893~maternal placenta development                                                                | 8     | 1.86E-04 |
| GO:0008219~cell death                                                                                   | 96    | 1.92E-04 |

|                                                                                     |     |          |
|-------------------------------------------------------------------------------------|-----|----------|
| GO:0012501~programmed cell death                                                    | 84  | 1.95E-04 |
| GO:0048514~blood vessel morphogenesis                                               | 37  | 2.18E-04 |
| GO:0031349~positive regulation of defense response                                  | 18  | 2.77E-04 |
| GO:0006917~induction of apoptosis                                                   | 50  | 2.79E-04 |
| GO:0042254~ribosome biogenesis                                                      | 25  | 2.85E-04 |
| GO:0006357~regulation of transcription from RNA polymerase II promoter              | 96  | 2.91E-04 |
| GO:0012502~induction of programmed cell death                                       | 50  | 3.01E-04 |
| GO:0016044~membrane organization                                                    | 57  | 3.13E-04 |
| GO:0010629~negative regulation of gene expression                                   | 71  | 3.28E-04 |
| GO:0006915~apoptosis                                                                | 82  | 3.29E-04 |
| GO:0007626~locomotory behavior                                                      | 44  | 3.79E-04 |
| GO:0007584~response to nutrient                                                     | 27  | 4.19E-04 |
| GO:0048584~positive regulation of response to stimulus                              | 39  | 4.87E-04 |
| GO:0032496~response to lipopolysaccharide                                           | 18  | 5.40E-04 |
| GO:0003006~reproductive developmental process                                       | 42  | 5.44E-04 |
| GO:0032103~positive regulation of response to external stimulus                     | 16  | 5.79E-04 |
| GO:0032101~regulation of response to external stimulus                              | 29  | 6.27E-04 |
| GO:0051384~response to glucocorticoid stimulus                                      | 18  | 6.32E-04 |
| GO:0031960~response to corticosteroid stimulus                                      | 19  | 6.38E-04 |
| GO:0006796~phosphate metabolic process                                              | 120 | 7.37E-04 |
| GO:0006793~phosphorus metabolic process                                             | 120 | 7.37E-04 |
| GO:0006351~transcription, DNA-dependent                                             | 45  | 7.85E-04 |
| GO:0045785~positive regulation of cell adhesion                                     | 15  | 9.15E-04 |
| GO:0045071~negative regulation of viral genome replication                          | 5   | 9.31E-04 |
| GO:0001568~blood vessel development                                                 | 39  | 0.00101  |
| GO:0032774~RNA biosynthetic process                                                 | 45  | 0.001046 |
| GO:0007178~transmembrane receptor protein serine/threonine kinase signaling pathway | 21  | 0.001051 |
| GO:0034341~response to interferon-gamma                                             | 6   | 0.001129 |
| GO:0033189~response to vitamin A                                                    | 12  | 0.001159 |
| GO:0042493~response to drug                                                         | 35  | 0.001405 |
| GO:0045944~positive regulation of transcription from RNA polymerase II promoter     | 53  | 0.001505 |
| GO:0045765~regulation of angiogenesis                                               | 15  | 0.001519 |
| GO:0006366~transcription from RNA polymerase II promoter                            | 37  | 0.001565 |
| GO:0043066~negative regulation of apoptosis                                         | 51  | 0.001569 |
| GO:0001944~vasculature development                                                  | 39  | 0.001588 |
| GO:0030155~regulation of cell adhesion                                              | 25  | 0.001597 |
| GO:0043434~response to peptide hormone stimulus                                     | 27  | 0.001809 |
| GO:0007264~small GTPase mediated signal transduction                                | 45  | 0.001909 |
| GO:0006468~protein amino acid phosphorylation                                       | 85  | 0.001932 |
| GO:0048525~negative regulation of viral reproduction                                | 5   | 0.002014 |
| GO:0050792~regulation of viral reproduction                                         | 8   | 0.002049 |
| GO:0010605~negative regulation of macromolecule metabolic process                   | 92  | 0.002057 |
| GO:0043069~negative regulation of programmed cell death                             | 51  | 0.002103 |
| GO:0060548~negative regulation of cell death                                        | 51  | 0.002215 |
| GO:0031667~response to nutrient levels                                              | 32  | 0.002239 |
| GO:0006916~anti-apoptosis                                                           | 33  | 0.002369 |
| GO:0031327~negative regulation of cellular biosynthetic process                     | 73  | 0.002438 |
| GO:0009890~negative regulation of biosynthetic process                              | 74  | 0.002777 |
| GO:0016310~phosphorylation                                                          | 98  | 0.002925 |
| GO:0070555~response to interleukin-1                                                | 7   | 0.003101 |
| GO:0051094~positive regulation of developmental process                             | 41  | 0.003135 |
| GO:0030031~cell projection assembly                                                 | 17  | 0.003456 |
| GO:0009628~response to abiotic stimulus                                             | 51  | 0.003506 |
| GO:0030030~cell projection organization                                             | 51  | 0.003506 |
| GO:0050727~regulation of inflammatory response                                      | 16  | 0.003612 |
| GO:0006984~ER-nuclear signaling pathway                                             | 10  | 0.00367  |
| GO:0002831~regulation of response to biotic stimulus                                | 9   | 0.003798 |
| GO:0045087~innate immune response                                                   | 24  | 0.003806 |
| GO:0009612~response to mechanical stimulus                                          | 13  | 0.004421 |

|                                                                                                               |     |          |
|---------------------------------------------------------------------------------------------------------------|-----|----------|
| GO:0010558~negative regulation of macromolecule biosynthetic process                                          | 70  | 0.004527 |
| GO:0030278~regulation of ossification                                                                         | 16  | 0.004667 |
| GO:0050729~positive regulation of inflammatory response                                                       | 9   | 0.004767 |
| GO:0007169~transmembrane receptor protein tyrosine kinase signaling pathway                                   | 34  | 0.004788 |
| GO:0045892~negative regulation of transcription, DNA-dependent                                                | 49  | 0.004875 |
| GO:0009967~positive regulation of signal transduction                                                         | 42  | 0.005214 |
| GO:0043281~regulation of caspase activity                                                                     | 16  | 0.005282 |
| GO:0051726~regulation of cell cycle                                                                           | 46  | 0.005364 |
| GO:0016481~negative regulation of transcription                                                               | 60  | 0.005545 |
| GO:0048732~gland development                                                                                  | 23  | 0.006024 |
| GO:0007243~protein kinase cascade                                                                             | 50  | 0.006287 |
| GO:0009991~response to extracellular stimulus                                                                 | 33  | 0.006546 |
| GO:0045069~regulation of viral genome replication                                                             | 6   | 0.006551 |
| GO:0051253~negative regulation of RNA metabolic process                                                       | 49  | 0.006649 |
| GO:0002230~positive regulation of defense response to virus by host                                           | 4   | 0.006808 |
| GO:0043280~positive regulation of caspase activity                                                            | 13  | 0.006856 |
| GO:0010952~positive regulation of peptidase activity                                                          | 13  | 0.006856 |
| GO:0016192~vesicle-mediated transport                                                                         | 72  | 0.006932 |
| GO:0045859~regulation of protein kinase activity                                                              | 47  | 0.007029 |
| GO:0001936~regulation of endothelial cell proliferation                                                       | 9   | 0.007262 |
| GO:0051101~regulation of DNA binding                                                                          | 21  | 0.007325 |
| GO:0006952~defense response                                                                                   | 76  | 0.007337 |
| GO:0052548~regulation of endopeptidase activity                                                               | 16  | 0.007528 |
| GO:0045934~negative regulation of nucleobase, nucleoside, nucleotide and nucleic acid metabolic process       | 65  | 0.007533 |
| GO:0000122~negative regulation of transcription from RNA polymerase II promoter                               | 38  | 0.007588 |
| GO:0045766~positive regulation of angiogenesis                                                                | 8   | 0.007705 |
| GO:0030330~DNA damage response, signal transduction by p53 class mediator                                     | 8   | 0.007705 |
| GO:0007179~transforming growth factor beta receptor signaling pathway                                         | 13  | 0.007869 |
| GO:0010647~positive regulation of cell communication                                                          | 45  | 0.007875 |
| GO:0022613~ribonucleoprotein complex biogenesis                                                               | 28  | 0.007951 |
| GO:0030522~intracellular receptor-mediated signaling pathway                                                  | 15  | 0.008057 |
| GO:0001816~cytokine production                                                                                | 11  | 0.008116 |
| GO:0043549~regulation of kinase activity                                                                      | 48  | 0.008177 |
| GO:0070271~protein complex biogenesis                                                                         | 64  | 0.008266 |
| GO:0006461~protein complex assembly                                                                           | 64  | 0.008266 |
| GO:0002683~negative regulation of immune system process                                                       | 16  | 0.008426 |
| GO:0060348~bone development                                                                                   | 21  | 0.008775 |
| GO:0032526~response to retinoic acid                                                                          | 9   | 0.008827 |
| GO:0001503~ossification                                                                                       | 20  | 0.008849 |
| GO:0042771~DNA damage response, signal transduction by p53 class mediator resulting in induction of apoptosis | 6   | 0.00909  |
| GO:0001938~positive regulation of endothelial cell proliferation                                              | 6   | 0.00909  |
| GO:0032355~response to estradiol stimulus                                                                     | 12  | 0.009325 |
| GO:0051240~positive regulation of multicellular organismal process                                            | 35  | 0.009918 |
| GO:0051172~negative regulation of nitrogen compound metabolic process                                         | 65  | 0.009978 |
| GO:0006350~transcription                                                                                      | 224 | 0.010431 |
| GO:0030099~myeloid cell differentiation                                                                       | 17  | 0.010656 |
| GO:0002697~regulation of immune effector process                                                              | 18  | 0.010723 |
| GO:0009617~response to bacterium                                                                              | 29  | 0.010849 |
| GO:0043242~negative regulation of protein complex disassembly                                                 | 10  | 0.011032 |
| GO:0052547~regulation of peptidase activity                                                                   | 16  | 0.01164  |
| GO:0045449~regulation of transcription                                                                        | 272 | 0.011682 |
| GO:0007565~female pregnancy                                                                                   | 19  | 0.011724 |
| GO:0022407~regulation of cell-cell adhesion                                                                   | 7   | 0.012532 |
| GO:0051797~regulation of hair follicle development                                                            | 4   | 0.012684 |
| GO:0002755~MyD88-dependent toll-like receptor signaling pathway                                               | 4   | 0.012684 |
| GO:0042634~regulation of hair cycle                                                                           | 4   | 0.012684 |
| GO:0016126~sterol biosynthetic process                                                                        | 9   | 0.012693 |
| GO:0007610~behavior                                                                                           | 59  | 0.01296  |



|                                                                                         |    |          |
|-----------------------------------------------------------------------------------------|----|----------|
| GO:0051098~regulation of binding                                                        | 24 | 0.013228 |
| GO:0050921~positive regulation of chemotaxis                                            | 8  | 0.014333 |
| GO:0008610~lipid biosynthetic process                                                   | 43 | 0.014546 |
| GO:0010038~response to metal ion                                                        | 21 | 0.014557 |
| GO:0043407~negative regulation of MAP kinase activity                                   | 9  | 0.015035 |
| GO:0009057~macromolecule catabolic process                                              | 91 | 0.015501 |
| GO:0006576~biogenic amine metabolic process                                             | 17 | 0.015692 |
| GO:0002221~pattern recognition receptor signaling pathway                               | 6  | 0.016039 |
| GO:0051338~regulation of transferase activity                                           | 48 | 0.016637 |
| GO:0019220~regulation of phosphate metabolic process                                    | 60 | 0.016772 |
| GO:0051174~regulation of phosphorus metabolic process                                   | 60 | 0.016772 |
| GO:0042325~regulation of phosphorylation                                                | 58 | 0.016791 |
| GO:0030595~leukocyte chemotaxis                                                         | 9  | 0.017673 |
| GO:0051336~regulation of hydrolase activity                                             | 44 | 0.018236 |
| GO:0051222~positive regulation of protein transport                                     | 13 | 0.018594 |
| GO:0001501~skeletal system development                                                  | 42 | 0.018648 |
| GO:0043405~regulation of MAP kinase activity                                            | 22 | 0.019115 |
| GO:0045778~positive regulation of ossification                                          | 7  | 0.019291 |
| GO:0010740~positive regulation of protein kinase cascade                                | 25 | 0.019339 |
| GO:0008354~germ cell migration                                                          | 5  | 0.019565 |
| GO:0006809~nitric oxide biosynthetic process                                            | 5  | 0.019565 |
| GO:0014910~regulation of smooth muscle cell migration                                   | 5  | 0.019565 |
| GO:0032870~cellular response to hormone stimulus                                        | 21 | 0.019844 |
| GO:0009743~response to carbohydrate stimulus                                            | 12 | 0.02012  |
| GO:0050920~regulation of chemotaxis                                                     | 8  | 0.020549 |
| GO:0030501~positive regulation of bone mineralization                                   | 6  | 0.020558 |
| GO:0002645~positive regulation of tolerance induction                                   | 4  | 0.020686 |
| GO:0002643~regulation of tolerance induction                                            | 4  | 0.020686 |
| GO:0044265~cellular macromolecule catabolic process                                     | 84 | 0.022458 |
| GO:0050866~negative regulation of cell activation                                       | 12 | 0.022567 |
| GO:0002274~myeloid leukocyte activation                                                 | 10 | 0.022926 |
| GO:0045669~positive regulation of osteoblast differentiation                            | 7  | 0.023454 |
| GO:0043331~response to dsRNA                                                            | 7  | 0.023454 |
| GO:0051345~positive regulation of hydrolase activity                                    | 26 | 0.023805 |
| GO:0060326~cell chemotaxis                                                              | 9  | 0.023918 |
| GO:0007182~common-partner SMAD protein phosphorylation                                  | 3  | 0.023984 |
| GO:0006970~response to osmotic stress                                                   | 8  | 0.024269 |
| GO:0006919~activation of caspase activity                                               | 11 | 0.02439  |
| GO:0045088~regulation of innate immune response                                         | 11 | 0.02439  |
| GO:0006954~inflammatory response                                                        | 42 | 0.02461  |
| GO:0043388~positive regulation of DNA binding                                           | 13 | 0.025592 |
| GO:0045637~regulation of myeloid cell differentiation                                   | 13 | 0.025592 |
| GO:0051099~positive regulation of binding                                               | 14 | 0.02561  |
| GO:0045184~establishment of protein localization                                        | 88 | 0.025752 |
| GO:0050688~regulation of defense response to virus                                      | 6  | 0.025832 |
| GO:0048008~platelet-derived growth factor receptor signaling pathway                    | 6  | 0.025832 |
| GO:0002758~innate immune response-activating signal transduction                        | 6  | 0.025832 |
| GO:0070169~positive regulation of biomineral formation                                  | 6  | 0.025832 |
| GO:0002218~activation of innate immune response                                         | 6  | 0.025832 |
| GO:0006525~arginine metabolic process                                                   | 5  | 0.026237 |
| GO:0046209~nitric oxide metabolic process                                               | 5  | 0.026237 |
| GO:0006730~one-carbon metabolic process                                                 | 18 | 0.027758 |
| GO:0006469~negative regulation of protein kinase activity                               | 15 | 0.027761 |
| GO:0015031~protein transport                                                            | 87 | 0.027885 |
| GO:0008630~DNA damage response, signal transduction resulting in induction of apoptosis | 8  | 0.028427 |
| GO:0030097~hemopoiesis                                                                  | 32 | 0.02845  |
| GO:0042060~wound healing                                                                | 27 | 0.028671 |
| GO:0009259~ribonucleotide metabolic process                                             | 22 | 0.029012 |
| GO:0018212~peptidyl-tyrosine modification                                               | 10 | 0.029597 |

|                                                                                |    |          |
|--------------------------------------------------------------------------------|----|----------|
| GO:0040007~growth                                                              | 26 | 0.030268 |
| GO:0031958~corticosteroid receptor signaling pathway                           | 4  | 0.030857 |
| GO:0007184~SMAD protein nuclear translocation                                  | 4  | 0.030857 |
| GO:0043627~response to estrogen stimulus                                       | 17 | 0.031072 |
| GO:0051092~positive regulation of NF-kappaB transcription factor activity      | 9  | 0.031564 |
| GO:0050714~positive regulation of protein secretion                            | 9  | 0.031564 |
| GO:0051607~defense response to virus                                           | 6  | 0.031898 |
| GO:0032570~response to progesterone stimulus                                   | 6  | 0.031898 |
| GO:0043123~positive regulation of I-kappaB kinase/NF-kappaB cascade            | 16 | 0.032106 |
| GO:0000060~protein import into nucleus, translocation                          | 8  | 0.03304  |
| GO:0048520~positive regulation of behavior                                     | 8  | 0.03304  |
| GO:0001952~regulation of cell-matrix adhesion                                  | 7  | 0.033491 |
| GO:0045428~regulation of nitric oxide biosynthetic process                     | 7  | 0.033491 |
| GO:0030728~ovulation                                                           | 5  | 0.034112 |
| GO:0002224~toll-like receptor signaling pathway                                | 5  | 0.034112 |
| GO:0050900~leukocyte migration                                                 | 11 | 0.0343   |
| GO:0048754~branching morphogenesis of a tube                                   | 12 | 0.034553 |
| GO:0031589~cell-substrate adhesion                                             | 16 | 0.0348   |
| GO:0042592~homeostatic process                                                 | 85 | 0.035657 |
| GO:0033673~negative regulation of kinase activity                              | 15 | 0.035927 |
| GO:0051591~response to cAMP                                                    | 9  | 0.035951 |
| GO:0043122~regulation of I-kappaB kinase/NF-kappaB cascade                     | 17 | 0.036237 |
| GO:0051129~negative regulation of cellular component organization              | 21 | 0.037073 |
| GO:0048534~hemopoietic or lymphoid organ development                           | 34 | 0.03746  |
| GO:0035023~regulation of Rho protein signal transduction                       | 16 | 0.037654 |
| GO:0001763~morphogenesis of a branching structure                              | 13 | 0.037681 |
| GO:0010035~response to inorganic substance                                     | 28 | 0.037719 |
| GO:0045884~regulation of survival gene product expression                      | 6  | 0.038781 |
| GO:0001569~patterning of blood vessels                                         | 6  | 0.038781 |
| GO:0045429~positive regulation of nitric oxide biosynthetic process            | 6  | 0.038781 |
| GO:0002252~immune effector process                                             | 20 | 0.038997 |
| GO:0007507~heart development                                                   | 29 | 0.039464 |
| GO:0048872~homeostasis of number of cells                                      | 16 | 0.040673 |
| GO:0043244~regulation of protein complex disassembly                           | 10 | 0.04197  |
| GO:0043392~negative regulation of DNA binding                                  | 10 | 0.04197  |
| GO:0051100~negative regulation of binding                                      | 11 | 0.042289 |
| GO:0009199~ribonucleoside triphosphate metabolic process                       | 18 | 0.043028 |
| GO:0022408~negative regulation of cell-cell adhesion                           | 4  | 0.043168 |
| GO:0052173~response to defenses of other organism during symbiotic interaction | 4  | 0.043168 |
| GO:0060416~response to growth hormone stimulus                                 | 4  | 0.043168 |
| GO:0050691~regulation of defense response to virus by host                     | 4  | 0.043168 |
| GO:0009125~nucleoside monophosphate catabolic process                          | 4  | 0.043168 |
| GO:0045684~positive regulation of epidermis development                        | 4  | 0.043168 |
| GO:0052200~response to host defenses                                           | 4  | 0.043168 |
| GO:0075136~response to host                                                    | 4  | 0.043168 |
| GO:0021700~developmental maturation                                            | 16 | 0.04386  |
| GO:0016311~dephosphorylation                                                   | 22 | 0.044962 |
| GO:0051798~positive regulation of hair follicle development                    | 3  | 0.045043 |
| GO:0010544~negative regulation of platelet activation                          | 3  | 0.045043 |
| GO:0045091~regulation of retroviral genome replication                         | 3  | 0.045043 |
| GO:0045896~regulation of transcription, mitotic                                | 3  | 0.045043 |
| GO:0006926~virus-infected cell apoptosis                                       | 3  | 0.045043 |
| GO:0070498~interleukin-1-mediated signaling pathway                            | 3  | 0.045043 |
| GO:0001757~somite specification                                                | 3  | 0.045043 |
| GO:0007568~aging                                                               | 17 | 0.045114 |
| GO:0030509~BMP signaling pathway                                               | 9  | 0.045914 |
| GO:0016568~chromatin modification                                              | 35 | 0.046203 |
| GO:0010212~response to ionizing radiation                                      | 11 | 0.046723 |
| GO:0051091~positive regulation of transcription factor activity                | 11 | 0.046723 |

|                                                                    |    |          |
|--------------------------------------------------------------------|----|----------|
| GO:0051241~negative regulation of multicellular organismal process | 23 | 0.047682 |
| GO:0046700~heterocycle catabolic process                           | 13 | 0.049058 |

---

**Supplementary Table 7. Overrepresented Gene Ontology categories regulated by IL-32 $\alpha$  in mouse carotid endothelium *in vivo*.**

| Molecular and Cellular Functions | Number of Changed Genes   |                                                   |                                       |                                       |
|----------------------------------|---------------------------|---------------------------------------------------|---------------------------------------|---------------------------------------|
|                                  | Non-Tg_LCA vs. Non-Tg RCA | IL-32 $\alpha$ -Tg LCA vs. IL-32 $\alpha$ -Tg RCA | IL-32 $\alpha$ -Tg RCA vs. Non-Tg RCA | IL-32 $\alpha$ -Tg LCA vs. Non-Tg LCA |
| Transport                        | 639                       | 344                                               | 49                                    | 47                                    |
| Translation                      | 136                       | 108                                               | 10                                    | 0                                     |
| Response to stress               | 463                       | 280                                               | 57                                    | 82                                    |
| Cell cycle                       | 254                       | 135                                               | 20                                    | 35                                    |
| Cell adhesion                    | 131                       | 89                                                | 28                                    | 32                                    |
| Signal transduction              | 614                       | 270                                               | 81                                    | 103                                   |
| Cell proliferation               | 121                       | 70                                                | 12                                    | 21                                    |
| Homeostasis                      | 208                       | 103                                               | 22                                    | 28                                    |
| Cell differentiation             | 473                       | 237                                               | 59                                    | 48                                    |
| Immune response                  | 136                       | 84                                                | 18                                    | 47                                    |
| Inflammatory response            | 86                        | 50                                                | 6                                     | 33                                    |
| Behavior                         | 73                        | 36                                                | 12                                    | 9                                     |
| Apoptotic process                | 235                       | 109                                               | 24                                    | 25                                    |
| <b>Total</b>                     | <b>4251</b>               | <b>2195</b>                                       | <b>547</b>                            | <b>379</b>                            |

**Supplementary Table 8. Changed genes that are involved in inflammation and cell growth and proliferation that regulated by IL-32 $\alpha$  in mouse carotid endothelium *in vivo*.**

| Gene Symbol    |  |  |              |         |              | hIL-32 $\alpha$ -Tg LCA vs. Non-Tg LCA |  |              |         |  |  |  |
|----------------|--|--|--------------|---------|--------------|----------------------------------------|--|--------------|---------|--|--|--|
| Inflammation   |  |  |              |         |              |                                        |  |              |         |  |  |  |
| Down-regulated |  |  | Fold-Changes | P value | Up-regulated |                                        |  | Fold-Changes | P value |  |  |  |
| Ptafr          |  |  | 0.24         | <0.001  | Saa3         |                                        |  | 5.44         | <0.001  |  |  |  |
| BC013712       |  |  | 0.25         | <0.001  |              |                                        |  |              |         |  |  |  |
| Slc11a1        |  |  | 0.30         | <0.001  |              |                                        |  |              |         |  |  |  |
| Fcer1g         |  |  | 0.32         | <0.001  |              |                                        |  |              |         |  |  |  |
| Il1b           |  |  | 0.32         | <0.001  |              |                                        |  |              |         |  |  |  |
| Clec7a         |  |  | 0.33         | <0.001  |              |                                        |  |              |         |  |  |  |
| Ccr1           |  |  | 0.34         | 0.008   |              |                                        |  |              |         |  |  |  |
| Tlr13          |  |  | 0.34         | 0.002   |              |                                        |  |              |         |  |  |  |
| Il1rn          |  |  | 0.35         | 0.001   |              |                                        |  |              |         |  |  |  |
| Csflr          |  |  | 0.36         | <0.001  |              |                                        |  |              |         |  |  |  |
| Cd14           |  |  | 0.38         | 0.006   |              |                                        |  |              |         |  |  |  |
| Ccl22          |  |  | 0.38         | 0.005   |              |                                        |  |              |         |  |  |  |
| Kdm6b          |  |  | 0.38         | <0.001  |              |                                        |  |              |         |  |  |  |
| Pik3cg         |  |  | 0.39         | 0.002   |              |                                        |  |              |         |  |  |  |
| Mefv           |  |  | 0.39         | 0.001   |              |                                        |  |              |         |  |  |  |
| Fcgr3          |  |  | 0.39         | <0.001  |              |                                        |  |              |         |  |  |  |
| Itgb2          |  |  | 0.39         | <0.001  |              |                                        |  |              |         |  |  |  |
| Pla2g7         |  |  | 0.40         | 0.003   |              |                                        |  |              |         |  |  |  |
| Ccl3           |  |  | 0.40         | 0.003   |              |                                        |  |              |         |  |  |  |
| Hck            |  |  | 0.42         | 0.001   |              |                                        |  |              |         |  |  |  |
| Syk            |  |  | 0.42         | <0.001  |              |                                        |  |              |         |  |  |  |
| Tlr8           |  |  | 0.43         | 0.004   |              |                                        |  |              |         |  |  |  |
| Serpib9        |  |  | 0.43         | <0.001  |              |                                        |  |              |         |  |  |  |
| Nlrp3          |  |  | 0.45         | 0.002   |              |                                        |  |              |         |  |  |  |
| Adam8          |  |  | 0.46         | 0.001   |              |                                        |  |              |         |  |  |  |
| Lyn            |  |  | 0.47         | 0.002   |              |                                        |  |              |         |  |  |  |
| Tgfb1          |  |  | 0.48         | <0.001  |              |                                        |  |              |         |  |  |  |
| Alox5ap        |  |  | 0.48         | <0.001  |              |                                        |  |              |         |  |  |  |
| Tlr2           |  |  | 0.48         | 0.015   |              |                                        |  |              |         |  |  |  |
| Myd88          |  |  | 0.49         | 0.001   |              |                                        |  |              |         |  |  |  |
| Tnfrsf1b       |  |  | 0.49         | 0.005   |              |                                        |  |              |         |  |  |  |
| Osm            |  |  | 0.50         | 0.024   |              |                                        |  |              |         |  |  |  |

| Cell Cycle and Cell Proliferation |  |  |              |         |              |  |  |              |         |  |  |  |
|-----------------------------------|--|--|--------------|---------|--------------|--|--|--------------|---------|--|--|--|
| Down-regulated                    |  |  | Fold-Changes | P value | Up-regulated |  |  | Fold-Changes | P value |  |  |  |
| Ccnb2                             |  |  | 0.12         | <0.001  | None         |  |  |              |         |  |  |  |
| Itgax                             |  |  | 0.18         | <0.001  |              |  |  |              |         |  |  |  |
| Igfbp3                            |  |  | 0.21         | 0.002   |              |  |  |              |         |  |  |  |
| Kif20a                            |  |  | 0.28         | 0.001   |              |  |  |              |         |  |  |  |
| Cep55                             |  |  | 0.29         | 0.001   |              |  |  |              |         |  |  |  |
| Slc11a1                           |  |  | 0.30         | <0.001  |              |  |  |              |         |  |  |  |
| Ptprc                             |  |  | 0.31         | <0.001  |              |  |  |              |         |  |  |  |
| Il1b                              |  |  | 0.32         | <0.001  |              |  |  |              |         |  |  |  |
| Plk1                              |  |  | 0.32         | 0.002   |              |  |  |              |         |  |  |  |
| Cdkn1a                            |  |  | 0.33         | <0.001  |              |  |  |              |         |  |  |  |
| Cks2                              |  |  | 0.34         | 0.016   |              |  |  |              |         |  |  |  |

|             |      |        |
|-------------|------|--------|
| Dusp1       | 0.34 | <0.001 |
| Mki67       | 0.34 | <0.001 |
| Ptpn6       | 0.35 | <0.001 |
| Ccna2       | 0.36 | <0.001 |
| Malt1       | 0.36 | 0.003  |
| Cxcr4       | 0.36 | <0.001 |
| Cd74        | 0.36 | <0.001 |
| Prkcd       | 0.36 | 0.004  |
| Ndc80       | 0.37 | 0.027  |
| Kif23       | 0.37 | 0.001  |
| Tpx2        | 0.37 | <0.001 |
| Anln        | 0.38 | 0.002  |
| Itgam       | 0.39 | 0.001  |
| C5ar1       | 0.39 | 0.028  |
| Slfn1       | 0.39 | <0.001 |
| Top2a       | 0.40 | 0.010  |
| Ect2        | 0.40 | 0.011  |
| Rgs2        | 0.42 | <0.001 |
| Itgal       | 0.43 | 0.005  |
| Tet2        | 0.44 | <0.001 |
| Nusap1      | 0.45 | 0.004  |
| Rasgrp4     | 0.45 | 0.014  |
| Kif11       | 0.45 | <0.001 |
| Dock2       | 0.45 | <0.001 |
| Stat4       | 0.46 | 0.049  |
| Kif2c       | 0.46 | <0.001 |
| Nuf2        | 0.47 | <0.001 |
| Txnip       | 0.48 | <0.001 |
| D2Erttd750e | 0.48 | 0.001  |
| Sesn2       | 0.48 | 0.006  |
| Racgap1     | 0.49 | 0.014  |
| Gpr132      | 0.49 | 0.022  |
| Rassf2      | 0.49 | 0.001  |

**Supplementary Table 9. List and sequences of qPCR primers for mRNA expression.**

| Primer Name  |     | Sequences                     |
|--------------|-----|-------------------------------|
| 18s          | For | 5'-AGGAATTGACGGAAGGGCACCA-3'  |
|              | Rev | 5'-GTGCAGCCCCGGACATCTAAG-3'   |
| VCAM-1       | For | 5'-TCTTGGGAGCCTCAACGGTA-3'    |
|              | Rev | 5'-CAAGTGAGGGCCATGGAGTC-3'    |
| ICAM-1       | For | 5'-GGACTCACCTGCTGGTCTCT-3'    |
|              | Rev | 5'-CCCCTGCGATCTAGGAATTT-3'    |
| TIMP3        | For | 5'-CACGGAAGCCTCTGAAAGTC-3'    |
|              | Rev | 5'-TCCCACCTCTCCACAAAGTT-3'    |
| RECK         | For | 5'-ATAGGCTGCAAACCCATCAT-3'    |
|              | Rev | 5'- CCGTAACATCCCAGCACATA-3'   |
| IL-1 $\beta$ | For | 5'-AGAGCCTGTGTTTTCTCCT-3'     |
|              | Rev | 5'-GAGAGTGCTGCCTAATGTCC-3'    |
| eNOS         | For | 5'-ATCCAGTGCCCTGCTTCA-3'      |
|              | Rev | 5'-GCAGGGCAAGTTAGGATCAG-3'    |
| MMP9         | For | 5'-ACGACATAGACGGCATCCA-3'     |
|              | Rev | 5'-GCTGTGGTTCAGTTGTGGTG-3'    |
| DGCR8        | For | 5'-GGGGTTCCTTACTACGCATGT-3'   |
|              | Rev | 5'-CACACTCTTGTCAGAGGTCTCCT-3' |
| DROSHA       | For | 5'- ATGCAAGGCAATACGTGTCAT -3' |
|              | Rev | 5'- TTTTGGGGTCTGAAAGCTGGT-3'  |
| DICER1       | For | 5'-AGATGGAGGCGGAGTTCAG-3'     |
|              | Rev | 5'-CAATGAGCAGGTTGGTCTCA-3'    |
| RPRD2        | For | 5'-GCAGCTTCCCATAATGCCAG-3'    |
|              | Rev | 5'-TTGGATTCGTGGATGTTTGTGA-3'  |
| DDX5         | For | 5'-GCACCGCACAAGAGGTAGAT-3'    |
|              | Rev | 5'-ATCCACTGAGAGCAACTGGC-3'    |
| KHSRP        | For | 5'-GCTGGAAGATGGAGACCAGC-3'    |
|              | Rev | 5'-GGGTCCCAGTTGAGAACCAA-3'    |
| XRN1         | For | 5'-GGTCTTTATGCTTGGAACCTCCT-3' |
|              | Rev | 5'-AATCAAGTCTCCTGAATCCTGAA-3' |
